# Supplementary material for: Discovery of novel brain permeable and G protein-biased beta-1 adrenergic receptor partial agonists for the treatment of neurocognitive disorders
Source: PubMed Central journal article supplement (PMC5529018; doi:10.1371/journal.pone.0180319), 2017-07-26

S1 Fig. HPLC and NMR spectra for Xamoterol (S), Xamoterol (R), STD-101-B1 to B9, D1 to D6, and E

Xamoterol (S)

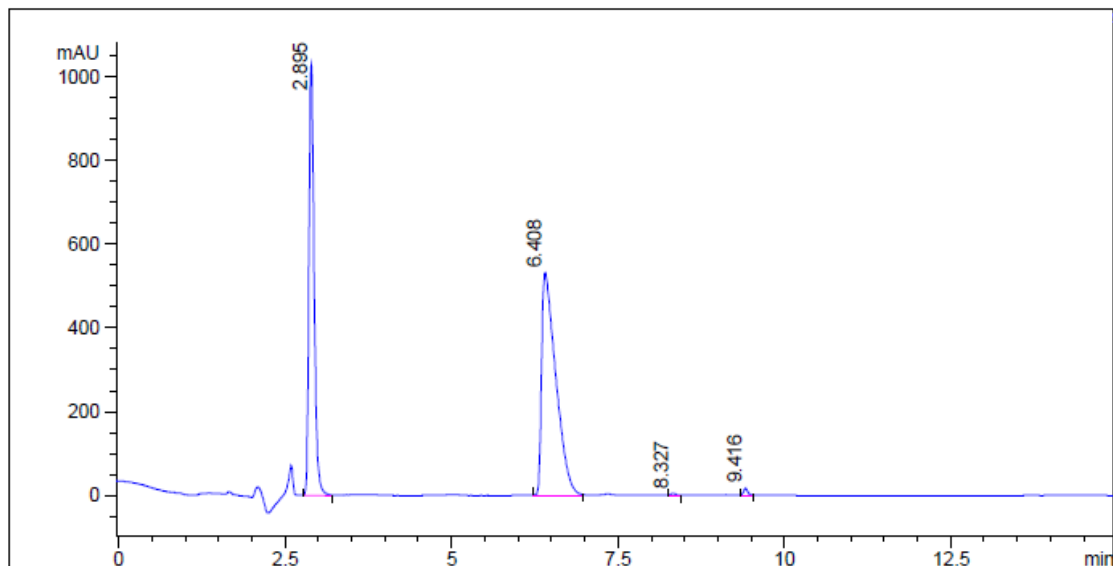

=====  
Area Percent Report  
=====

Signal 1: DAD1 A, Sig=220,4 Ref=off

| Peak # | RT [min] | Type | Width [min] | Height | Area     | Area % |
|--------|----------|------|-------------|--------|----------|--------|
| 1      | 2.895    | MM   | 0.091       | 65.167 | 5617.917 | 41.359 |
| 2      | 6.408    | BB   | 0.217       | 33.535 | 7877.501 | 57.994 |
| 3      | 8.327    | BB   | 0.064       | 0.280  | 18.450   | 0.136  |
| 4      | 9.416    | BB   | 0.066       | 1.018  | 69.460   | 0.511  |

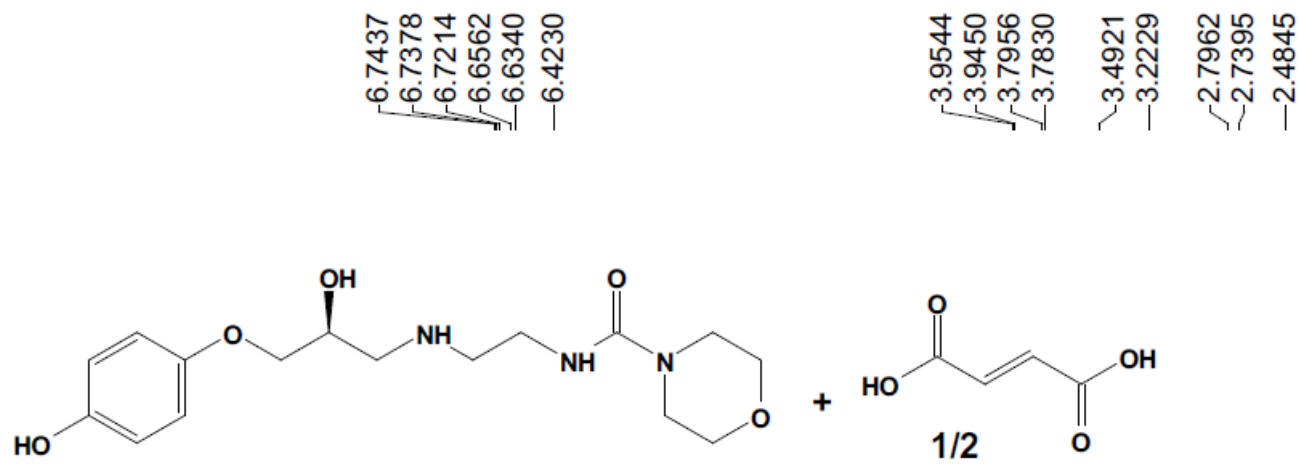

Xamoterol (S)  
 400MHz <sup>1</sup>HNMR DMSO-d<sub>6</sub>

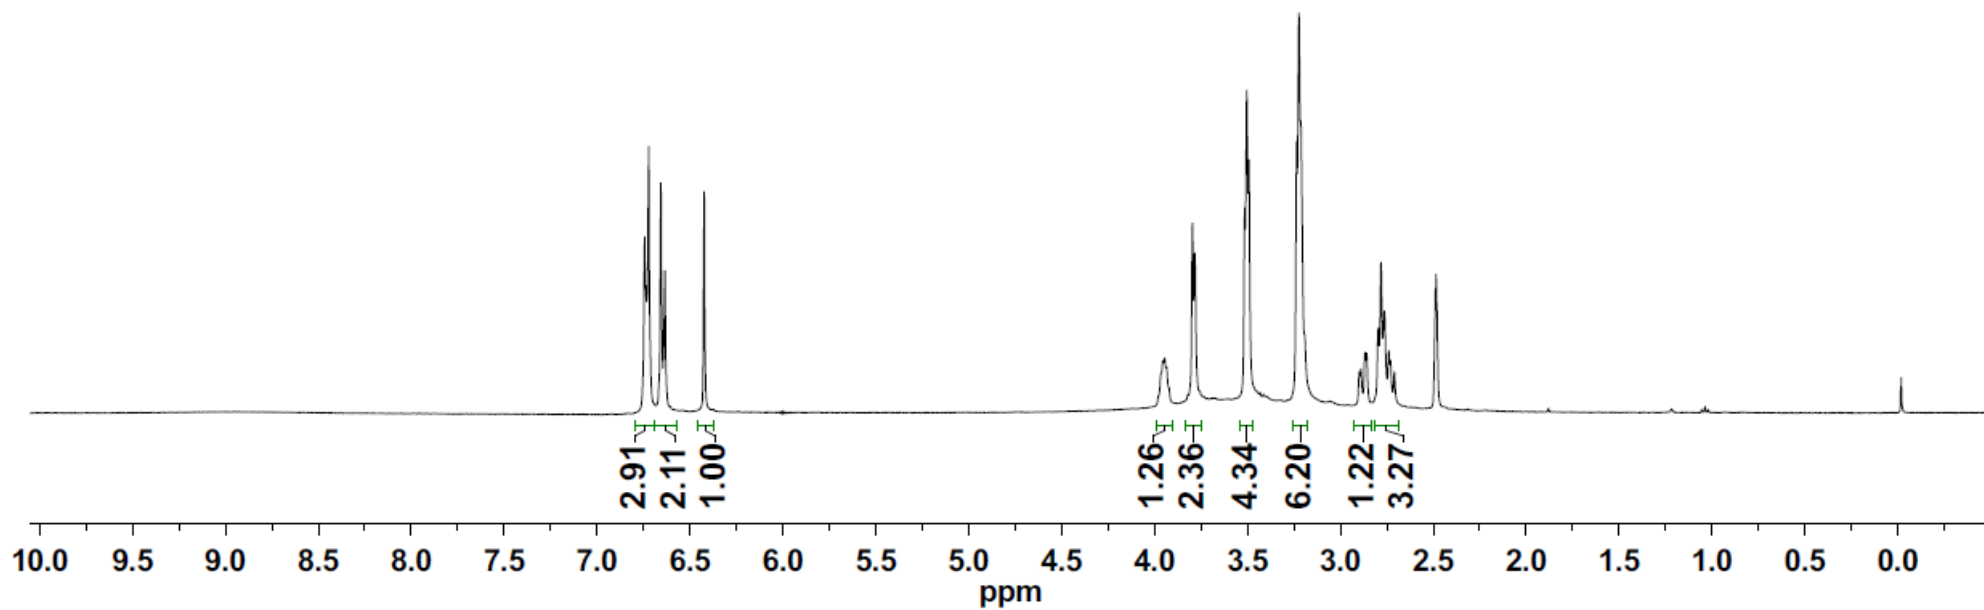

—0.0189

# Xamoterol (R)

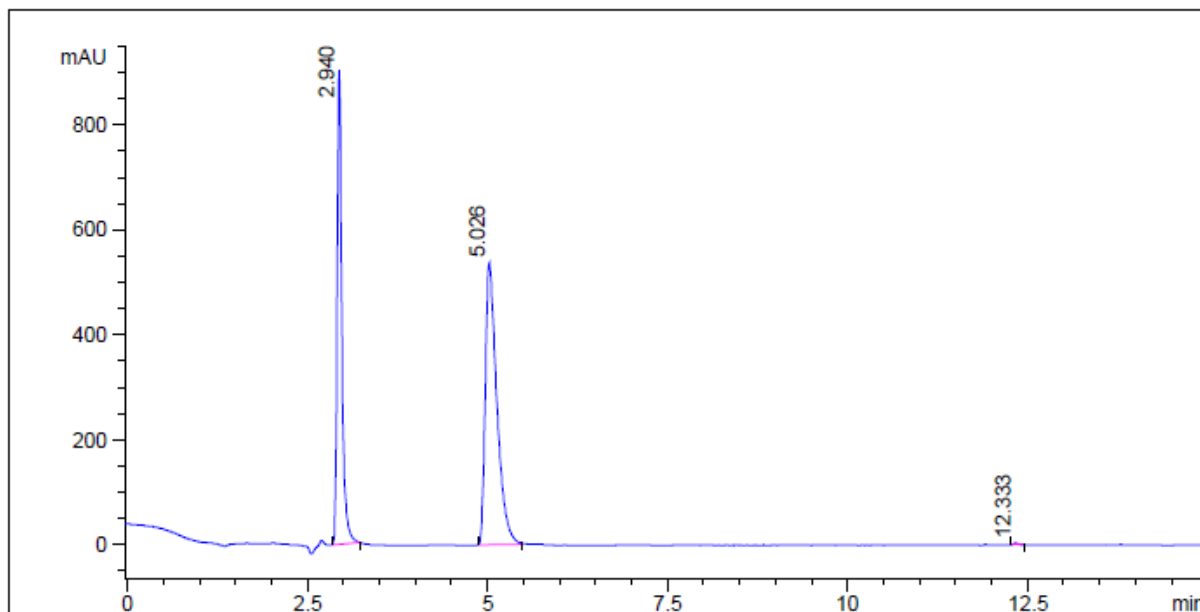

=====  
Area Percent Report  
=====

Signal 1: DAD1 A, Sig=220,4 Ref=off

| Peak # | RT [min] | Type | Width [min] | Height | Area     | Area % |
|--------|----------|------|-------------|--------|----------|--------|
| 1      | 2.940    | MM   | 0.076       | 62.591 | 4116.884 | 40.822 |
| 2      | 5.026    | BB   | 0.163       | 37.154 | 5950.455 | 59.003 |
| 3      | 12.333   | BB   | 0.074       | 0.255  | 17.608   | 0.175  |

=====

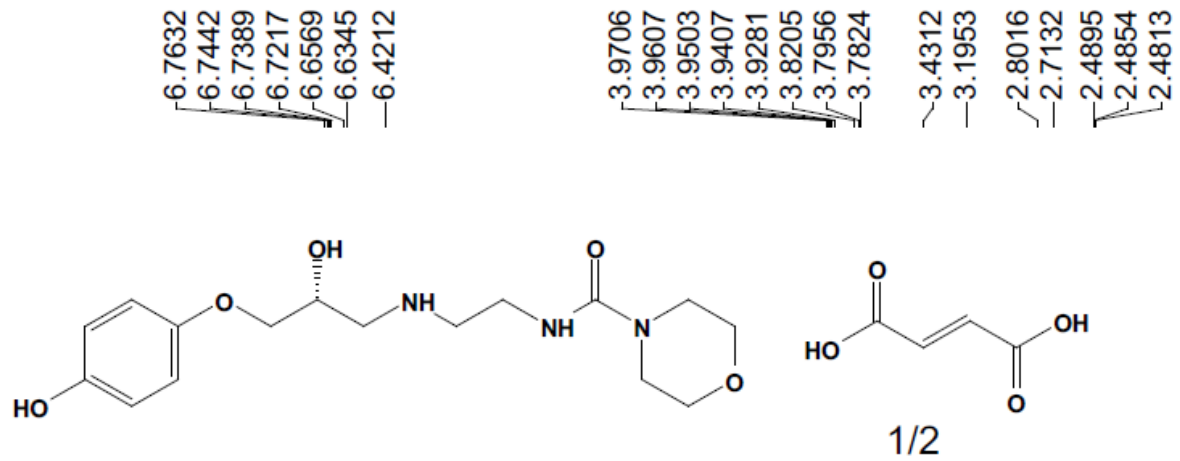

Xamoterol (R)  
 400MHz <sup>1</sup>HNMR DMSO-d<sub>6</sub>

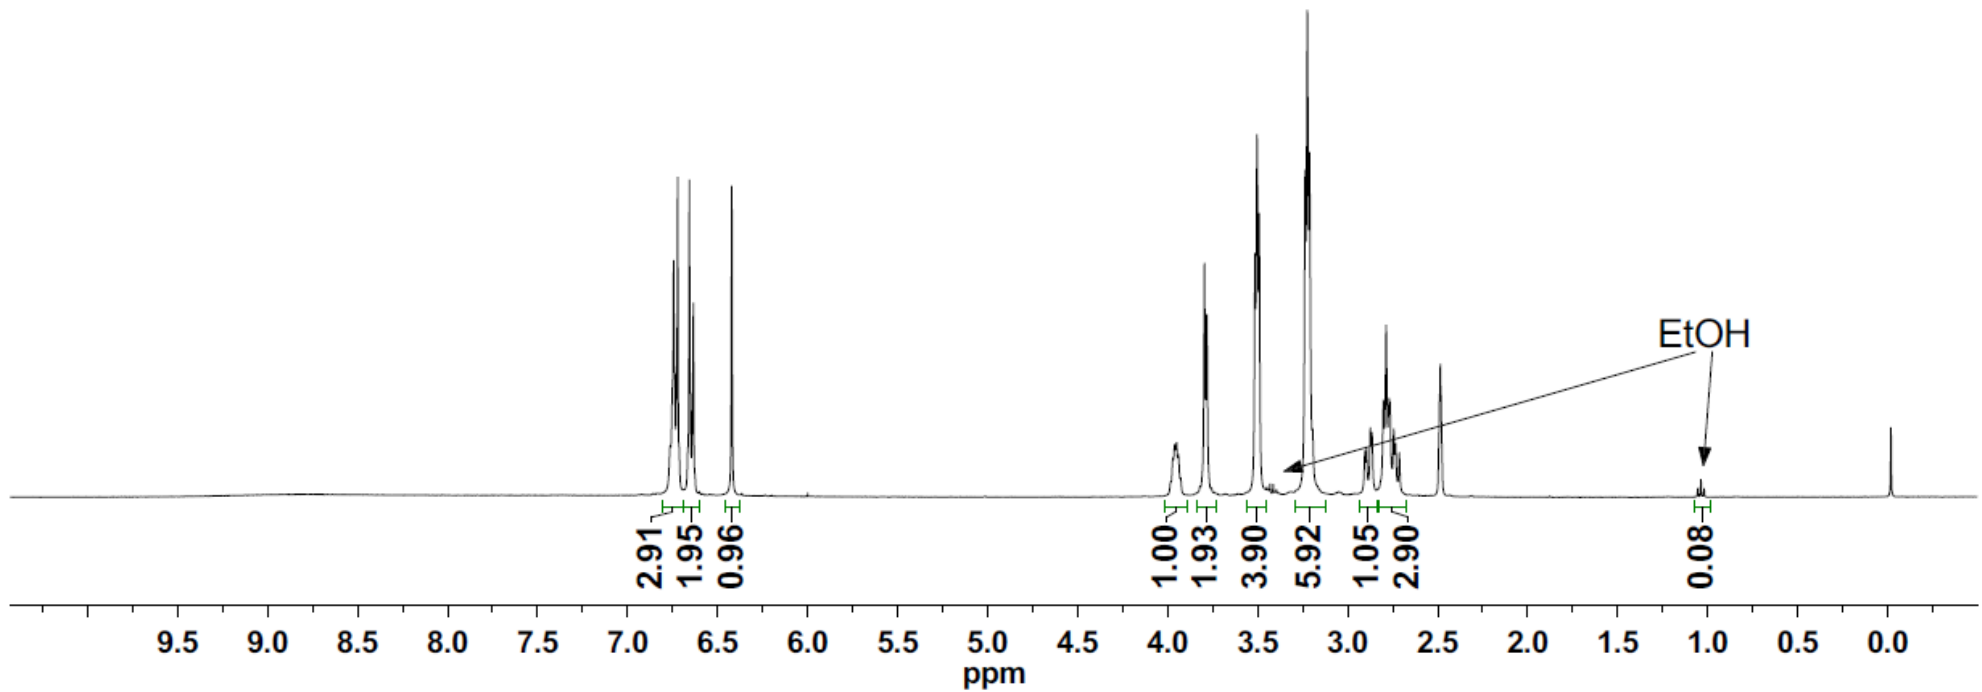

STD-101-B1

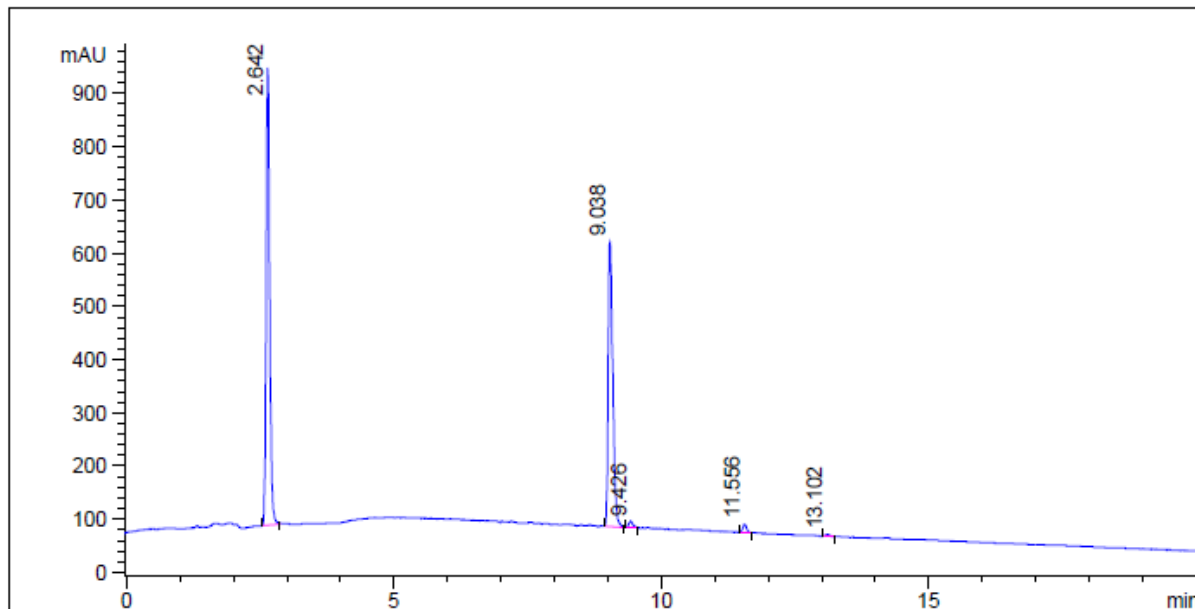

=====  
Area Percent Report  
=====

Signal 1: DAD1 A, Sig=220,4 Ref=off

| Peak # | RT [min] | Type | Width [min] | Height | Area     | Area % |
|--------|----------|------|-------------|--------|----------|--------|
| 1      | 2.642    | BB   | 0.069       | 60.396 | 3951.477 | 54.116 |
| 2      | 9.038    | BB   | 0.092       | 37.413 | 3190.146 | 43.689 |
| 3      | 9.426    | BB   | 0.080       | 0.846  | 63.986   | 0.876  |
| 4      | 11.556   | BB   | 0.078       | 1.094  | 77.589   | 1.063  |
| 5      | 13.102   | BB   | 0.079       | 0.252  | 18.717   | 0.256  |

=====

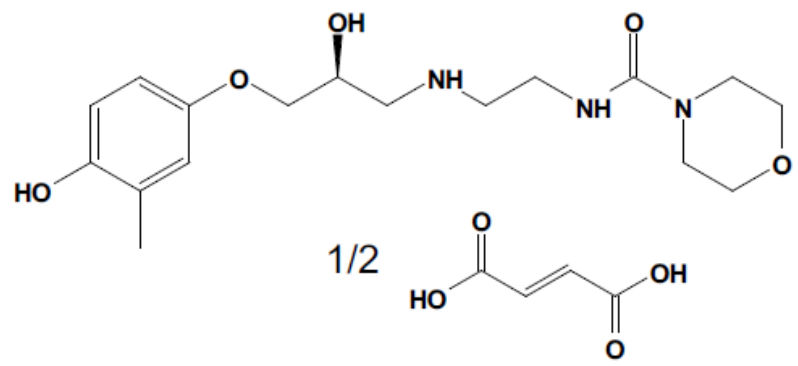

STD-101-B1  
 400MHz <sup>1</sup>HNMR DMSO-d<sub>6</sub>+D<sub>2</sub>O

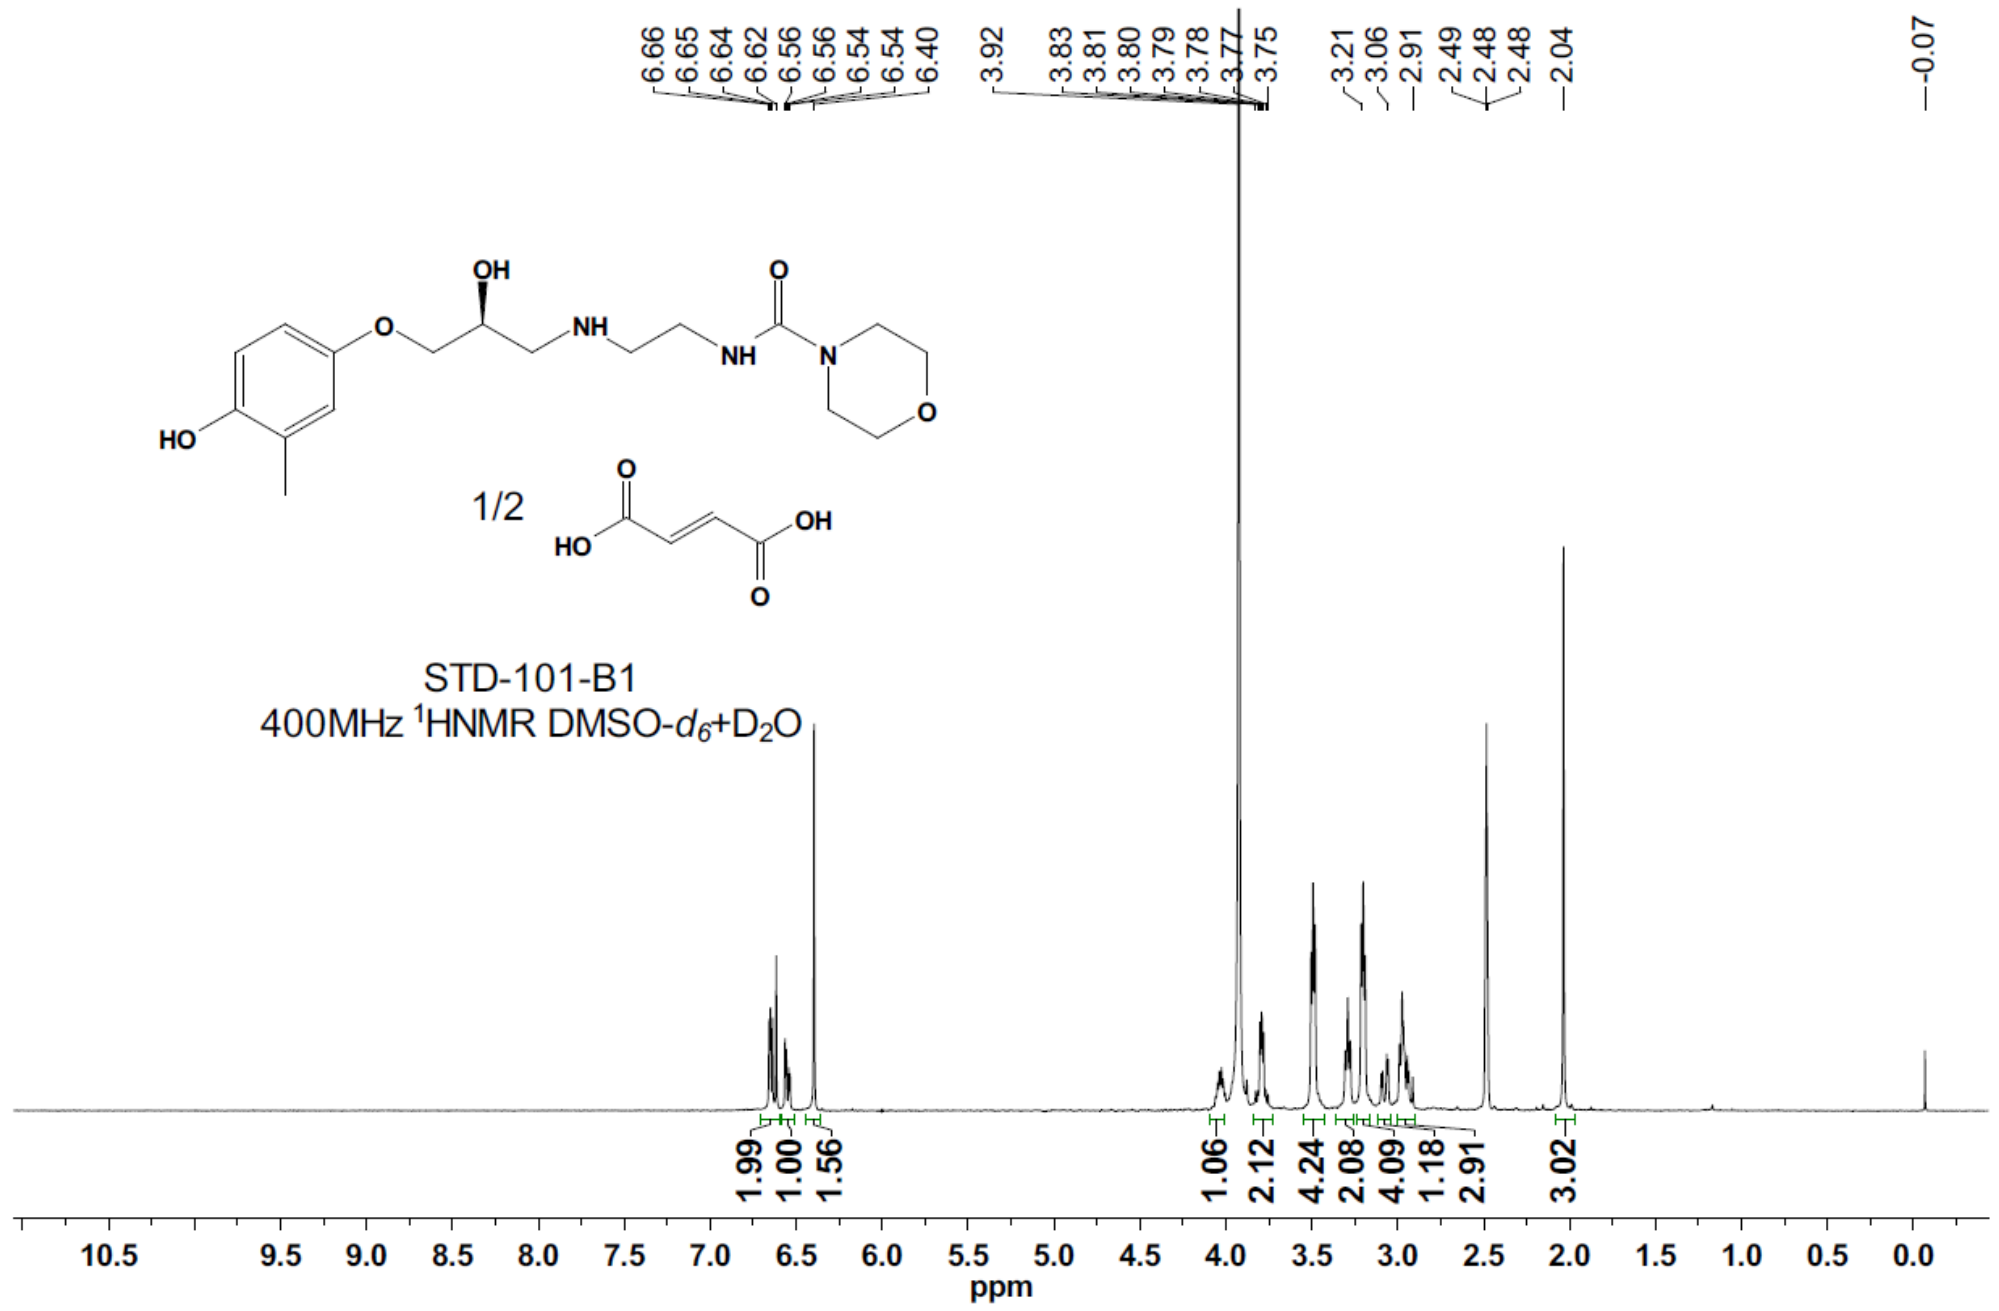

STD-101-B2

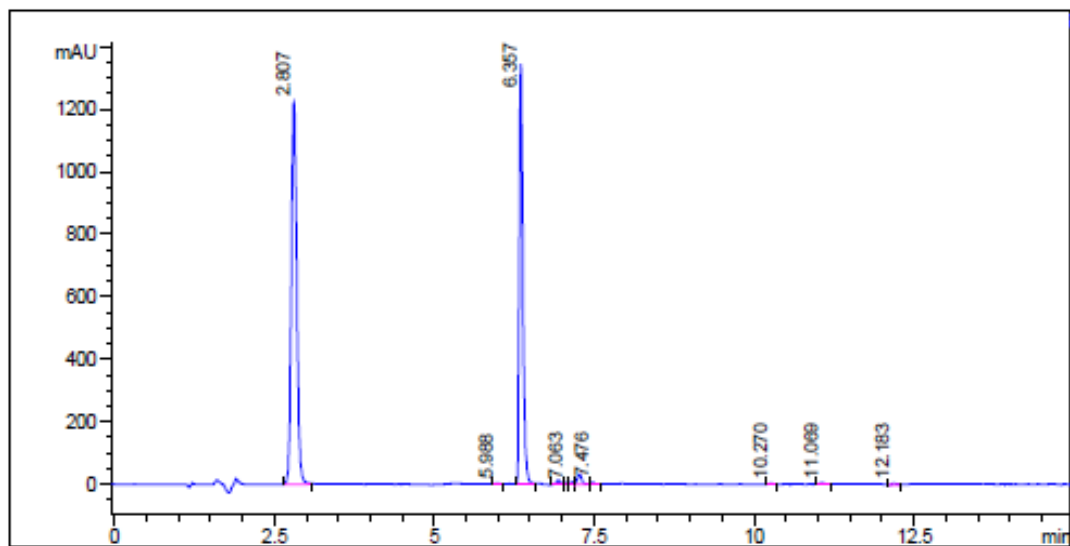

=====  
 Area Percent Report  
 =====

Signal 1: DAD1 A, Sig=220,16 Ref=off

| Peak # | RT [min] | Type | Width [min] | Height | Area     | Area % |
|--------|----------|------|-------------|--------|----------|--------|
| 1      | 2.807    | BB   | 0.093       | 46.136 | 7235.272 | 55.747 |
| 2      | 5.988    | BB   | 0.059       | 0.108  | 11.110   | 0.086  |
| 3      | 6.357    | BB   | 0.063       | 50.758 | 5379.355 | 41.447 |
| 4      | 6.940    | BV   | 0.069       | 0.529  | 63.537   | 0.490  |
| 5      | 7.063    | VV   | 0.061       | 0.213  | 22.896   | 0.176  |
| 6      | 7.156    | VV   | 0.057       | 0.290  | 28.395   | 0.219  |
| 7      | 7.276    | VB   | 0.077       | 1.259  | 157.849  | 1.216  |
| 8      | 7.476    | BB   | 0.058       | 0.237  | 23.434   | 0.181  |
| 9      | 10.270   | BB   | 0.057       | 0.123  | 12.150   | 0.094  |
| 10     | 11.069   | BB   | 0.079       | 0.168  | 22.468   | 0.173  |
| 11     | 12.183   | BB   | 0.071       | 0.178  | 22.373   | 0.172  |

=====

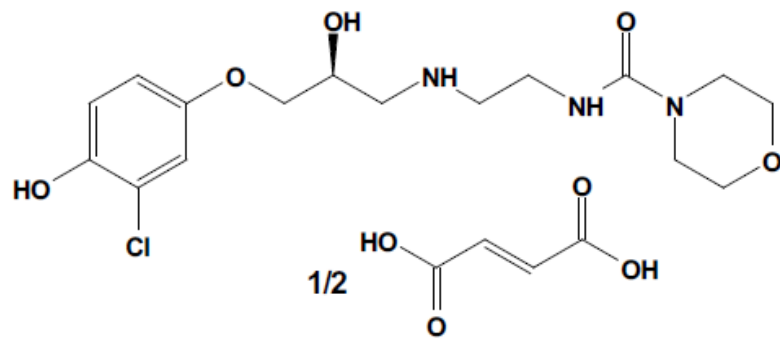

STD-101-B2  
400MHz  $^1\text{H}$ NMR DMSO- $d_6$ +D $_2$ O

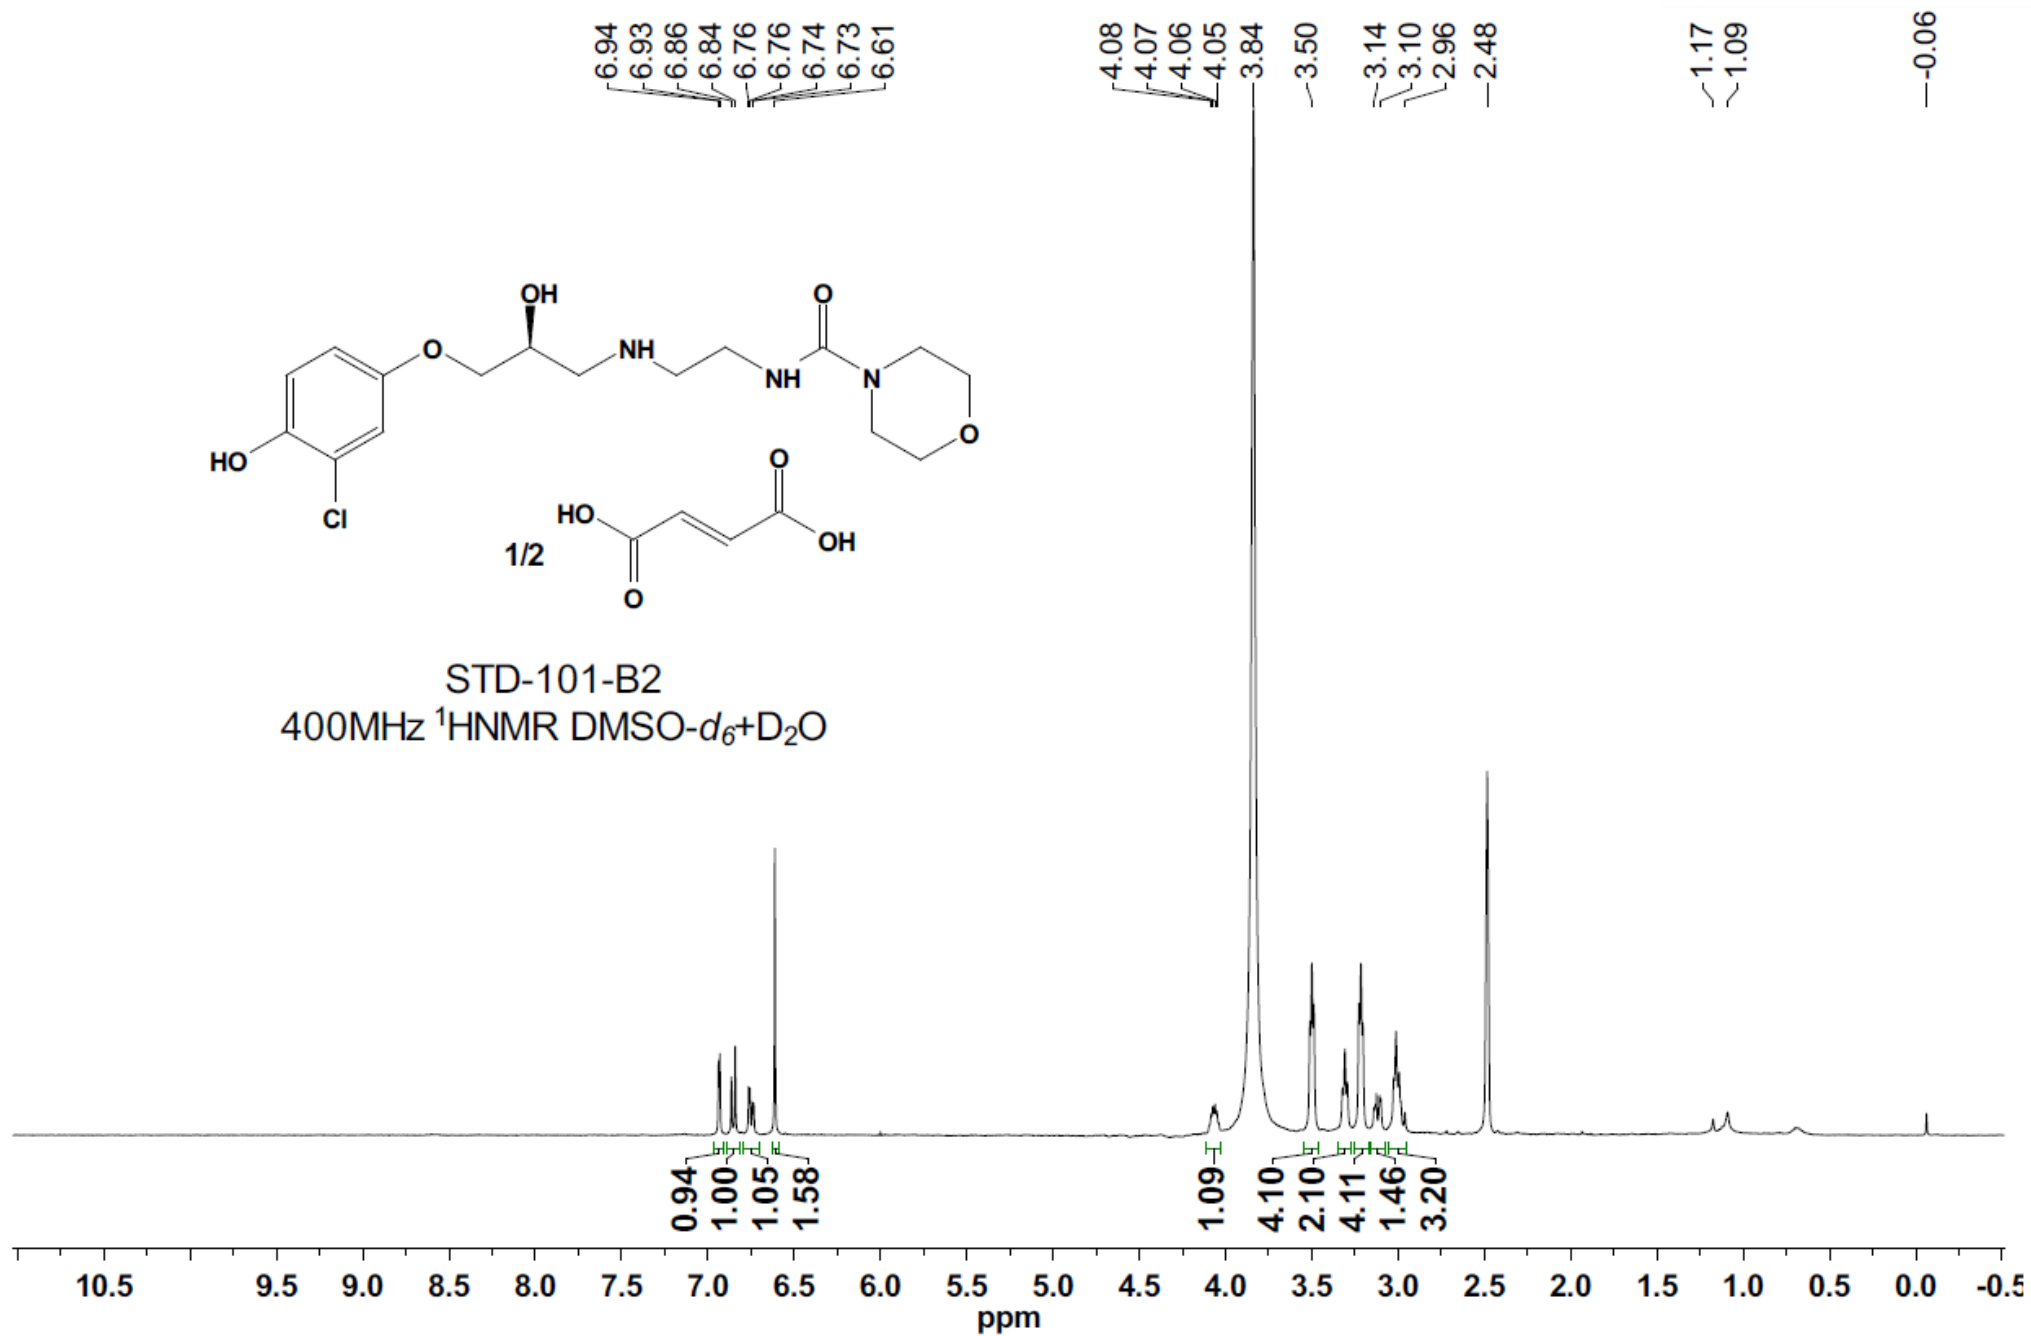





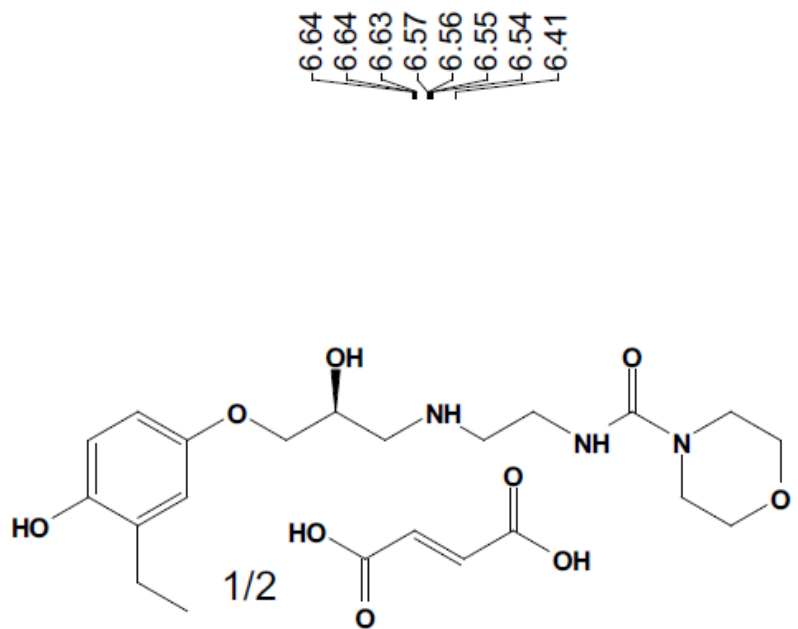

STD-101-B3  
400MHz <sup>1</sup>HNMR DMSO-d<sub>6</sub>+D<sub>2</sub>O

6.64  
6.64  
6.63  
6.57  
6.56  
6.55  
6.54  
6.41

4.02  
4.01  
3.80

3.49  
3.21  
3.04  
2.88  
2.48  
2.46  
2.44  
2.42

1.08  
1.06  
1.04

-0.05

1.94  
1.00  
1.26

0.97  
2.16  
4.07

2.13  
3.98  
1.34  
3.24  
1.81

2.96

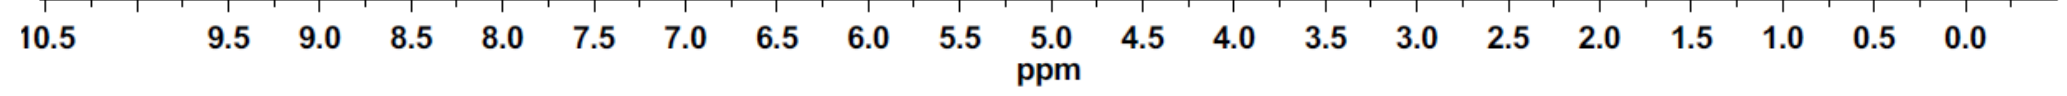

STD-101-B4

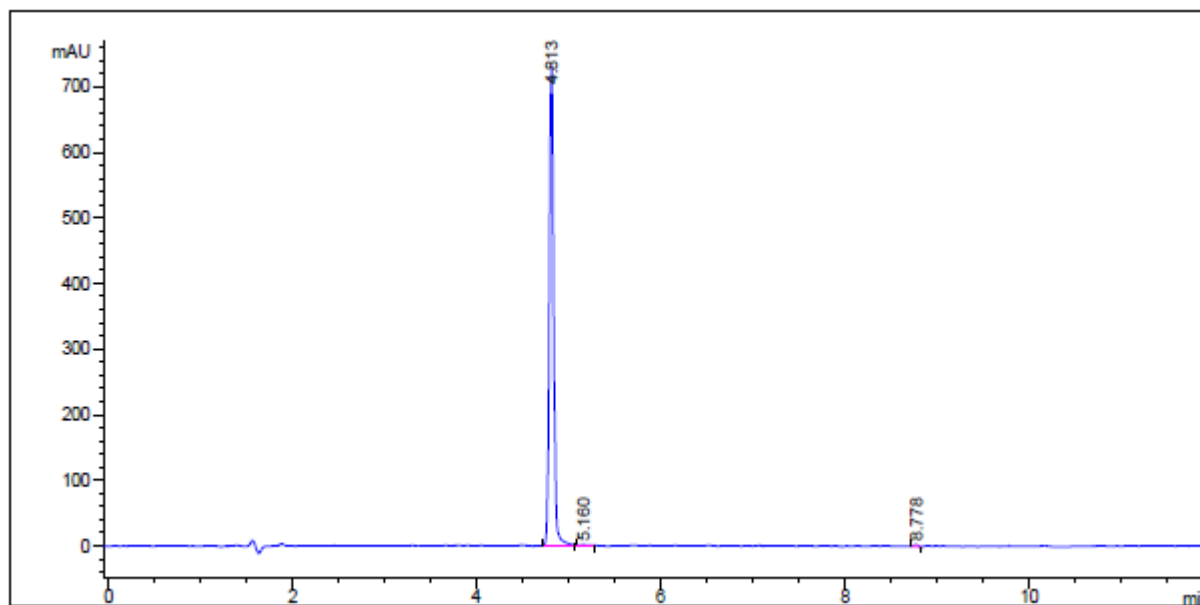

=====  
Area Percent Report  
=====

Signal 1: DAD1 A, Sig=220,4 Ref=off  
Signal has been modified after loading from rawdata file!

| Peak # | RetTime [min] | Type | Width [min] | Area [mAU*s] | Height [mAU] | Area %  |
|--------|---------------|------|-------------|--------------|--------------|---------|
| 1      | 4.813         | BB   | 0.0527      | 2439.61719   | 736.07660    | 99.0070 |
| 2      | 5.160         | BB   | 0.1032      | 13.66538     | 1.71004      | 0.5546  |
| 3      | 8.778         | BV   | 0.0505      | 10.80243     | 3.27725      | 0.4384  |

Totals :                   2464.08500   741.06389

=====

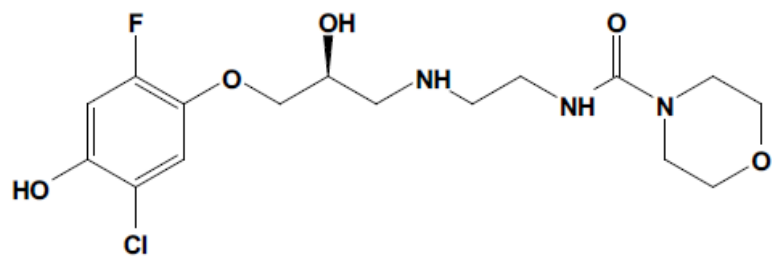

STD-101-B4  
400MHz <sup>1</sup>HNMR MeOD-d<sub>4</sub>

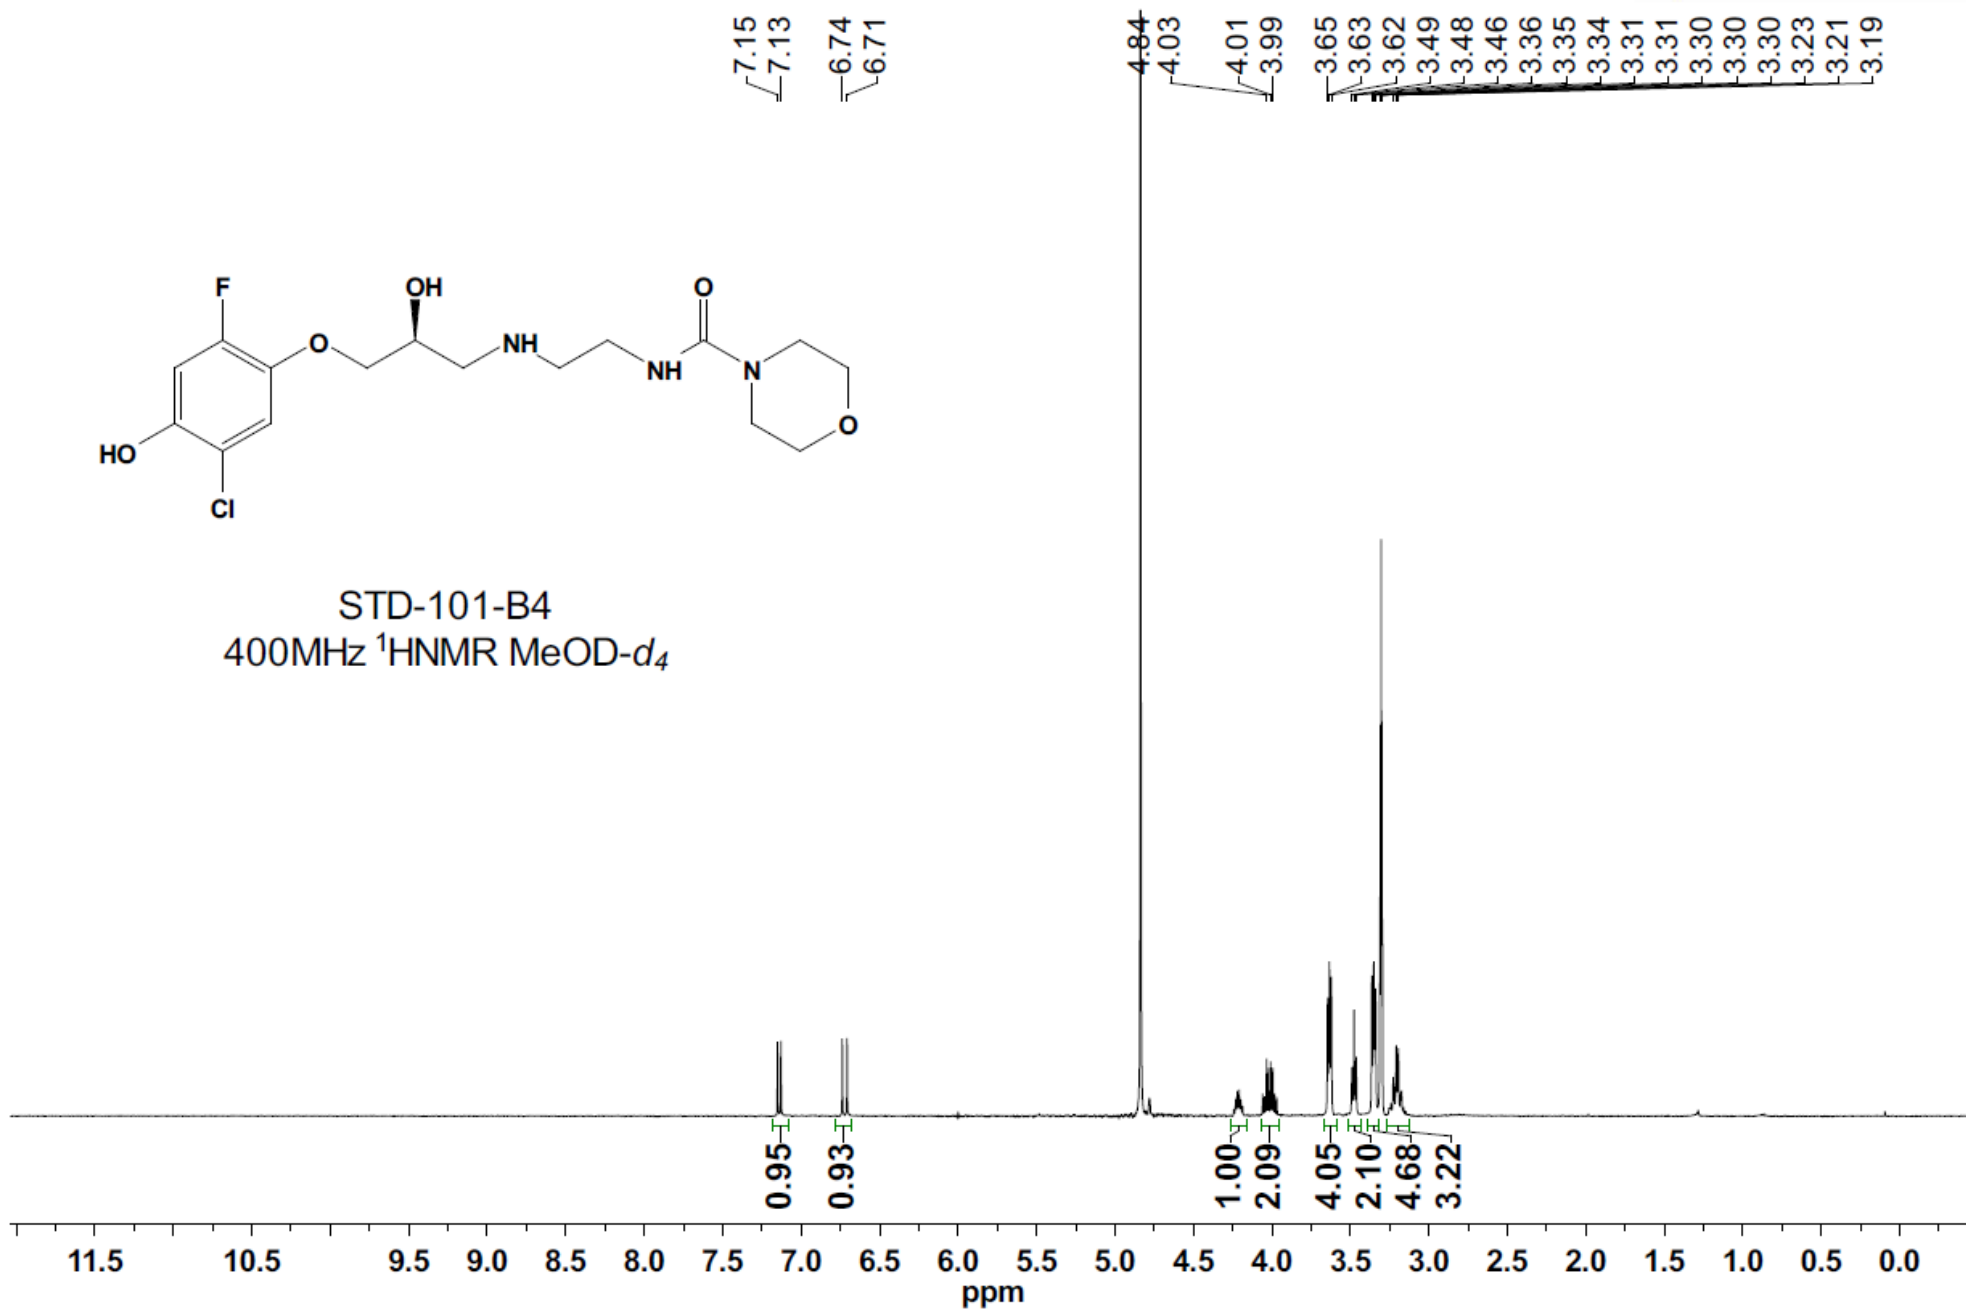

STD-101-B5

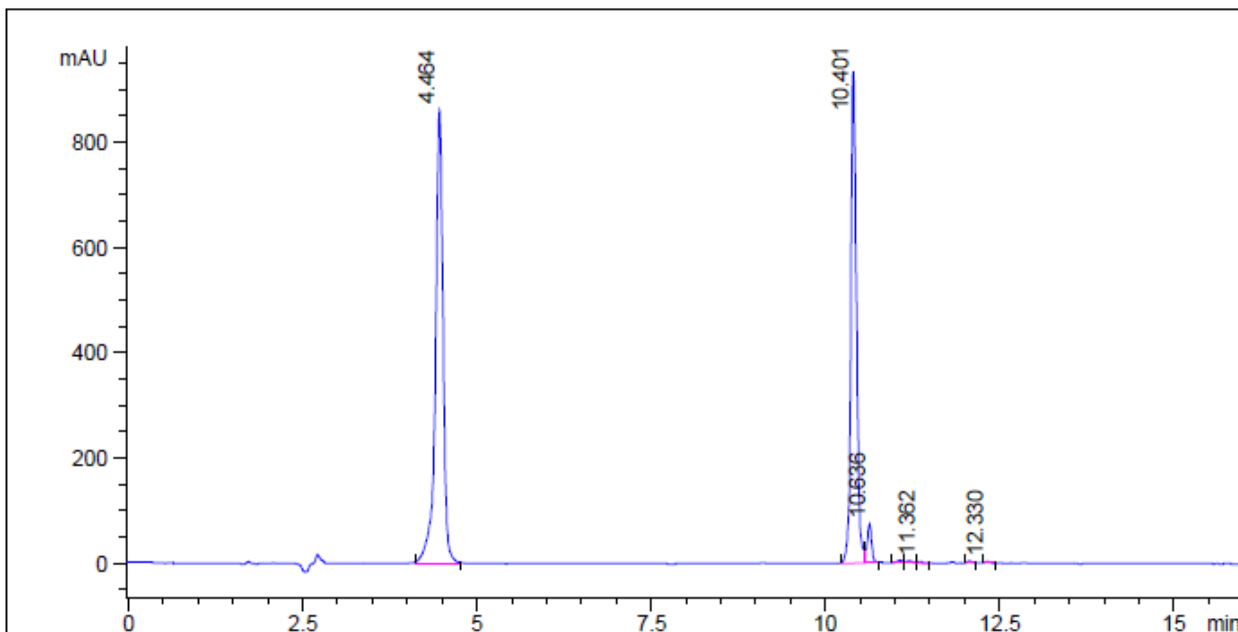

=====  
 Area Percent Report  
 =====

Signal 1: DAD1 A, Sig=220,16 Ref=off

| Peak # | RT [min] | Type | Width [min] | Height | Area     | Area % |
|--------|----------|------|-------------|--------|----------|--------|
| 1      | 4.464    | BB   | 0.117       | 45.579 | 6586.832 | 53.728 |
| 2      | 10.401   | BV   | 0.085       | 49.459 | 5232.674 | 42.682 |
| 3      | 10.636   | VB   | 0.070       | 3.918  | 340.150  | 2.775  |
| 4      | 11.074   | BV   | 0.081       | 0.264  | 27.774   | 0.227  |
| 5      | 11.207   | VV   | 0.093       | 0.236  | 27.107   | 0.221  |
| 6      | 11.362   | VB   | 0.066       | 0.163  | 13.753   | 0.112  |
| 7      | 12.071   | BB   | 0.063       | 0.206  | 16.418   | 0.134  |
| 8      | 12.330   | BB   | 0.068       | 0.176  | 14.867   | 0.121  |

=====  
 =====

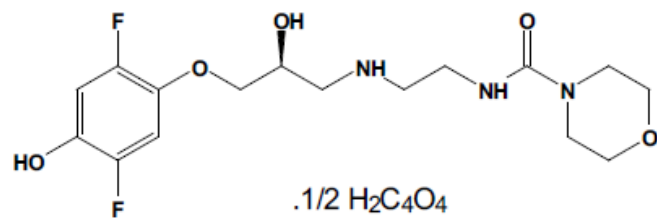

STD-101-B5  
400MHz <sup>1</sup>HNMR DMSO-*d*<sub>6</sub>+D<sub>2</sub>O

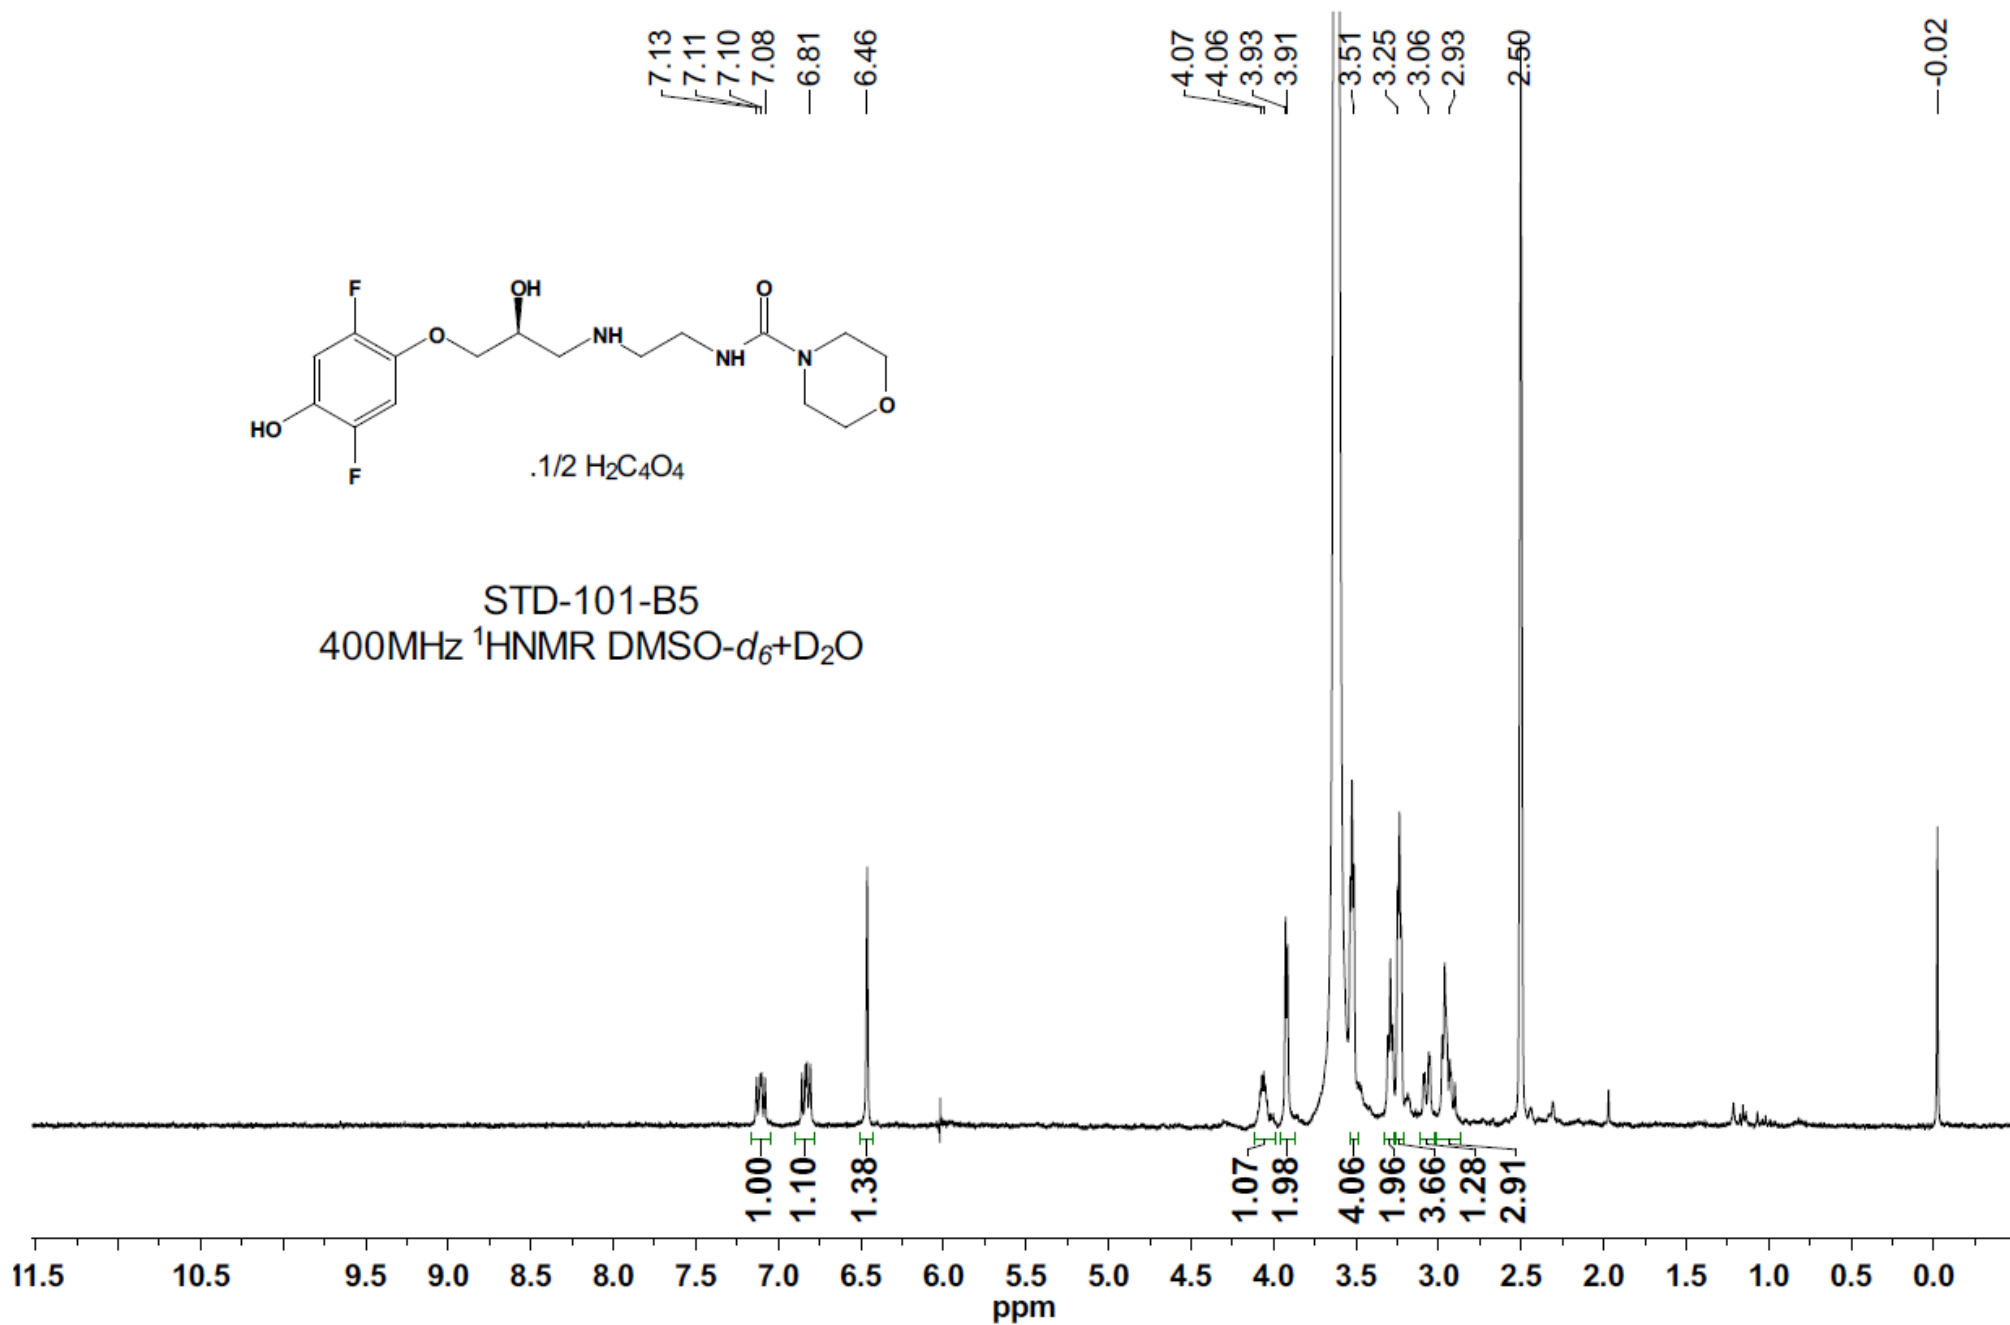

STD-101-B6

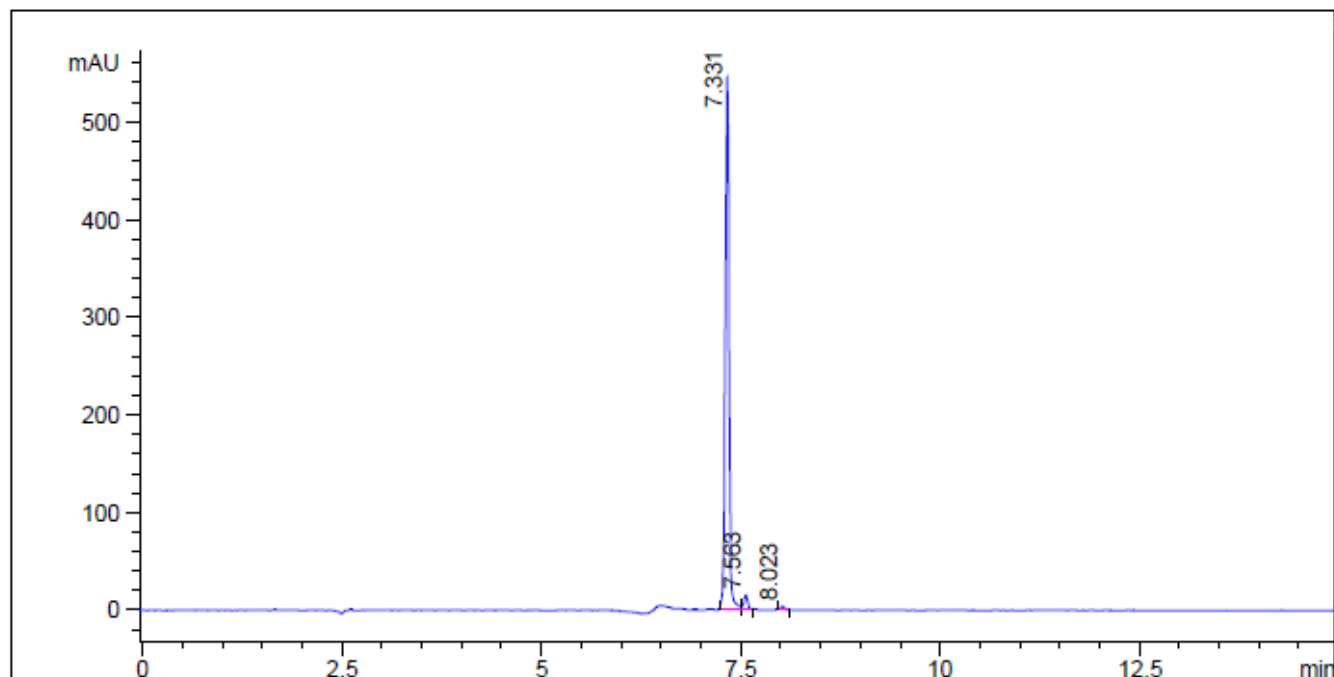

=====  
Area Percent Report  
=====

Signal 1: DAD1 A, Sig=220,16 Ref=off

| Peak # | RT [min] | Type | Width [min] | Height | Area     | Area % |
|--------|----------|------|-------------|--------|----------|--------|
| 1      | 7.331    | BB   | 0.051       | 96.713 | 1824.201 | 96.575 |
| 2      | 7.563    | BB   | 0.053       | 2.646  | 53.425   | 2.828  |
| 3      | 8.023    | BB   | 0.048       | 0.642  | 11.277   | 0.597  |

-----

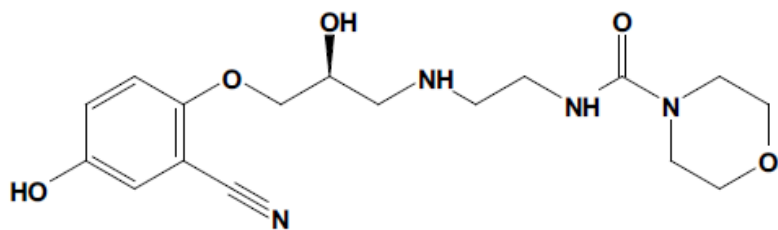

STD-101-B6  
400MHz <sup>1</sup>HNMR DMSO-d<sub>6</sub>

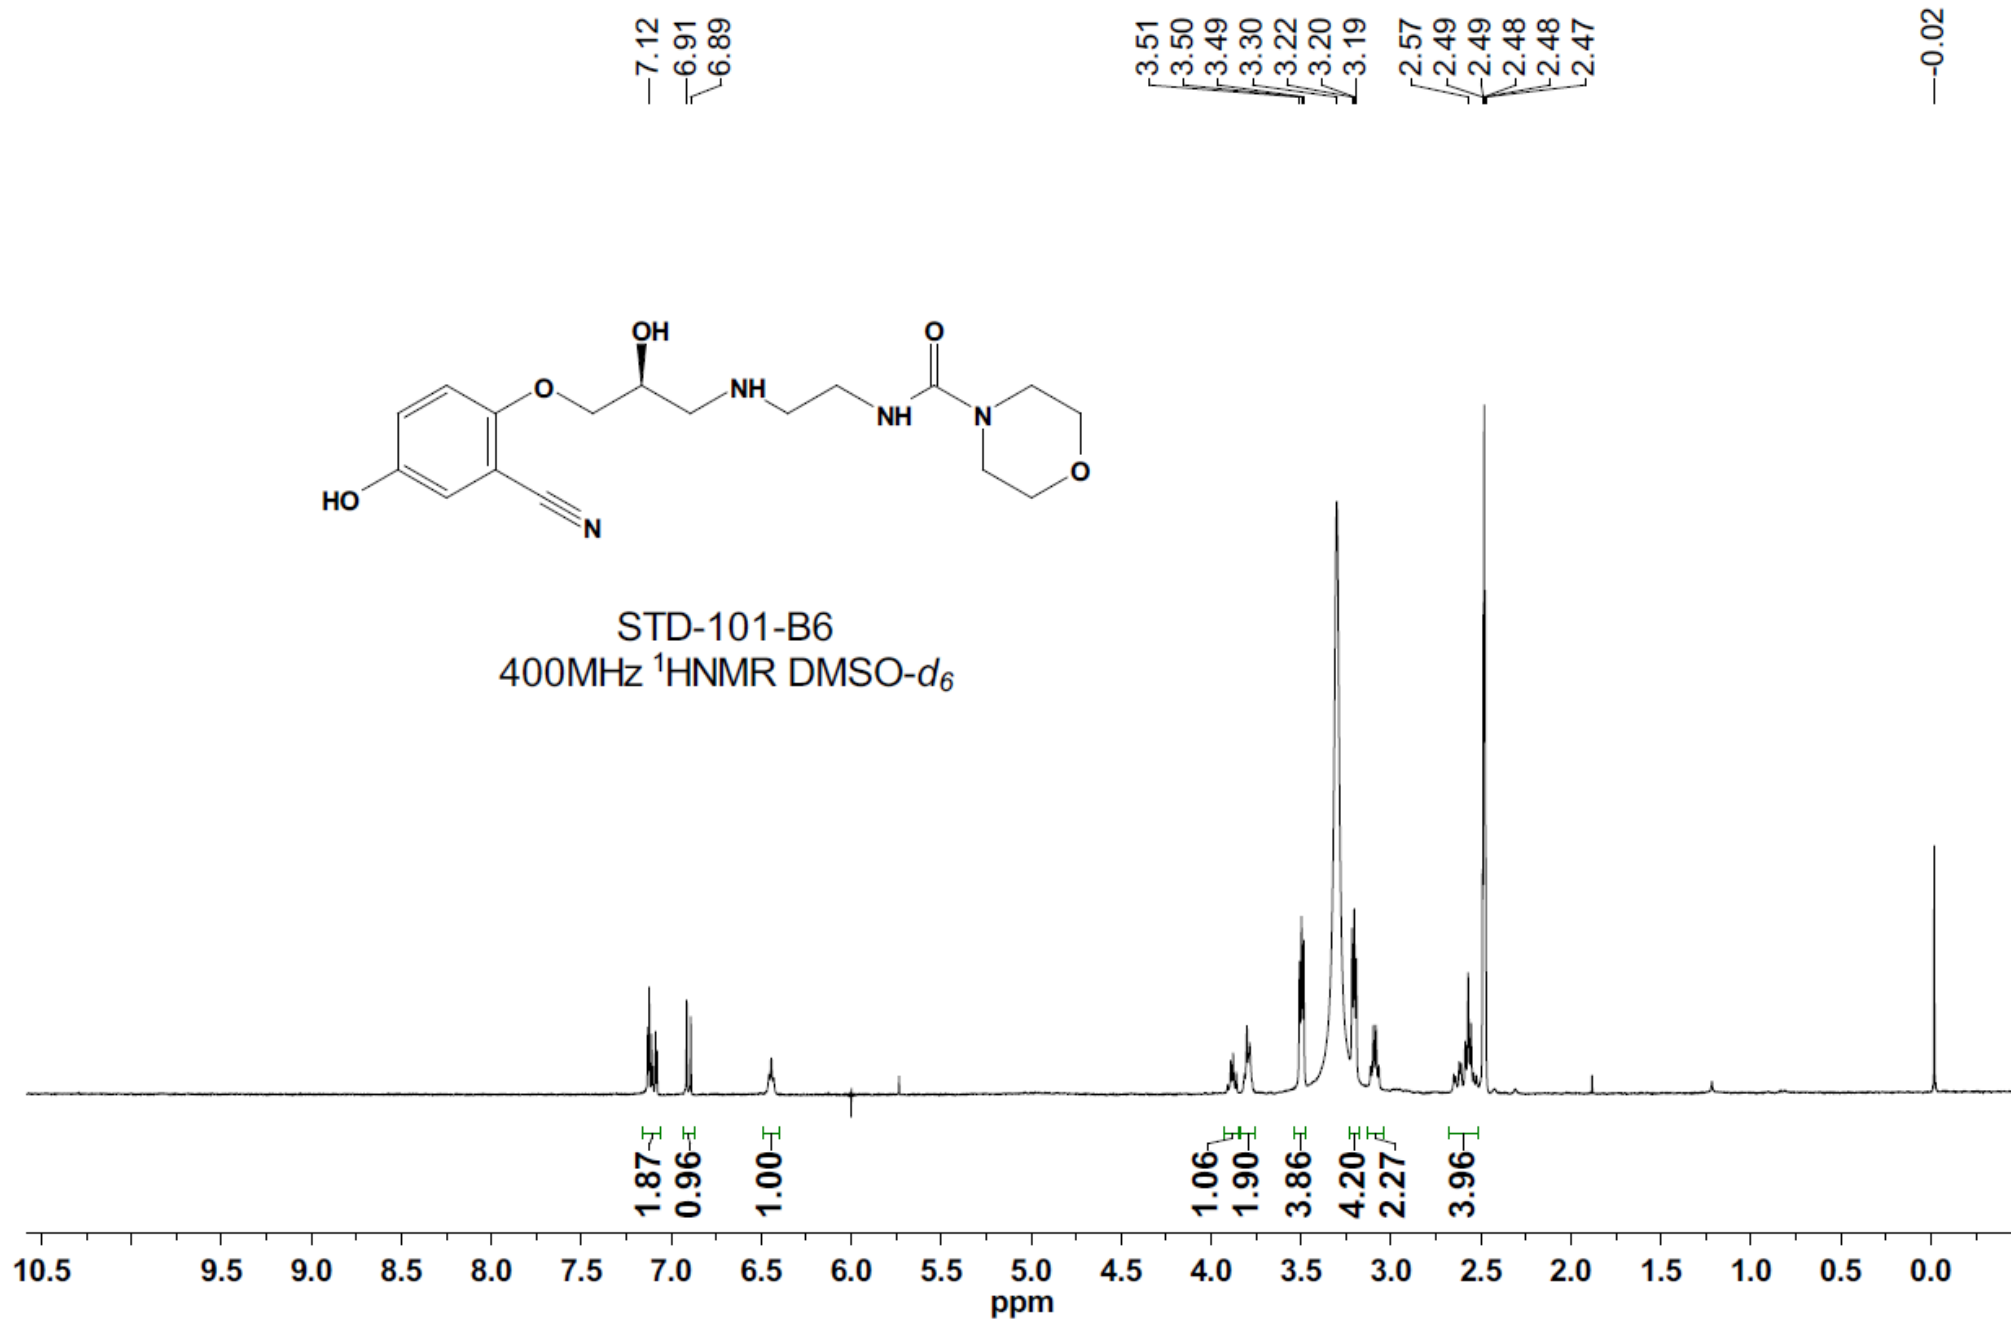



STD-101-B7

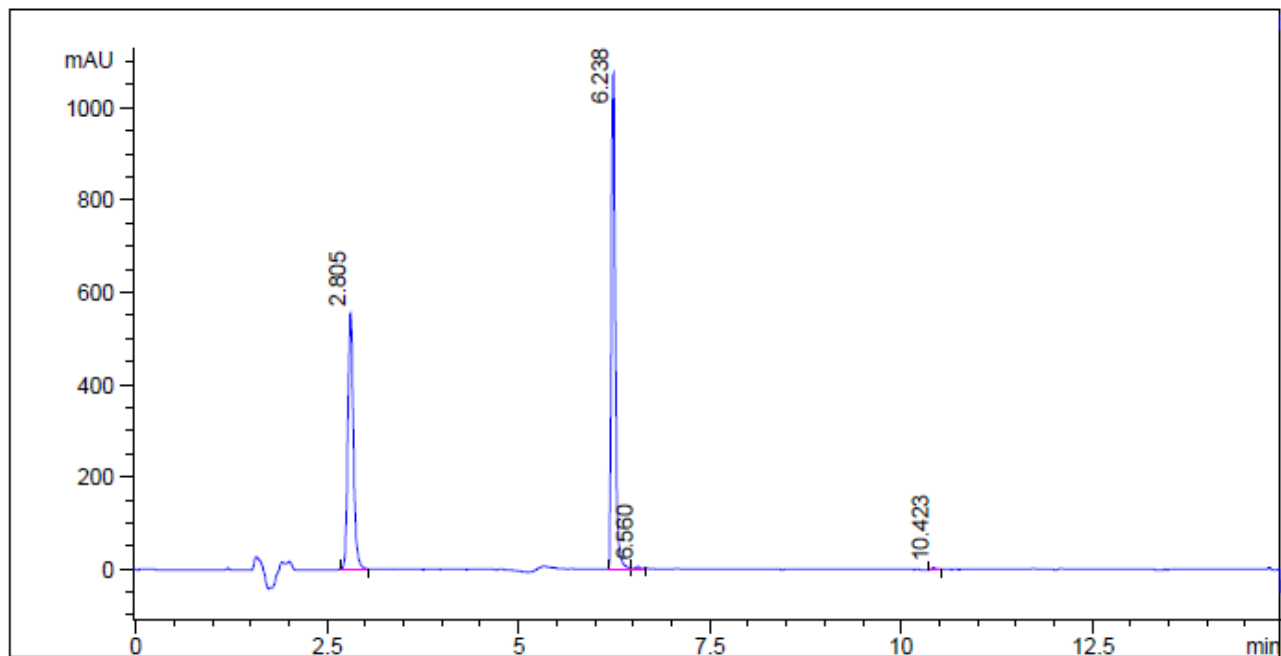

=====  
Area Percent Report  
=====

Signal 1: DAD1 A, Sig=220,16 Ref=off

| Peak # | RT [min] | Type | Width [min] | Height | Area     | Area % |
|--------|----------|------|-------------|--------|----------|--------|
| 1      | 2.805    | BB   | 0.078       | 33.802 | 2788.547 | 42.609 |
| 2      | 6.238    | BB   | 0.052       | 65.673 | 3719.376 | 56.832 |
| 3      | 6.560    | BB   | 0.071       | 0.295  | 23.590   | 0.360  |
| 4      | 10.423   | BB   | 0.054       | 0.231  | 12.941   | 0.198  |

=====

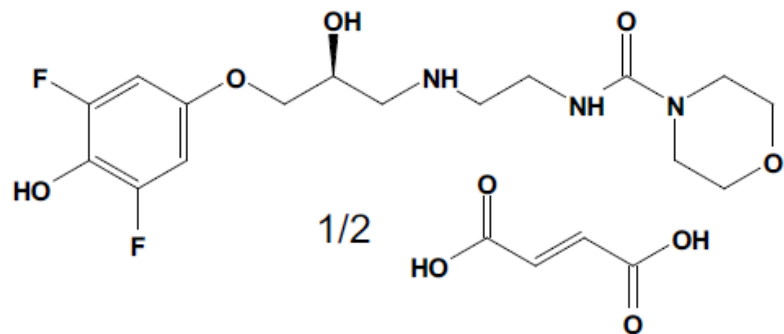

STD-101-B7  
 400MHz <sup>1</sup>HNMR DMSO-d<sub>6</sub>+D<sub>2</sub>O

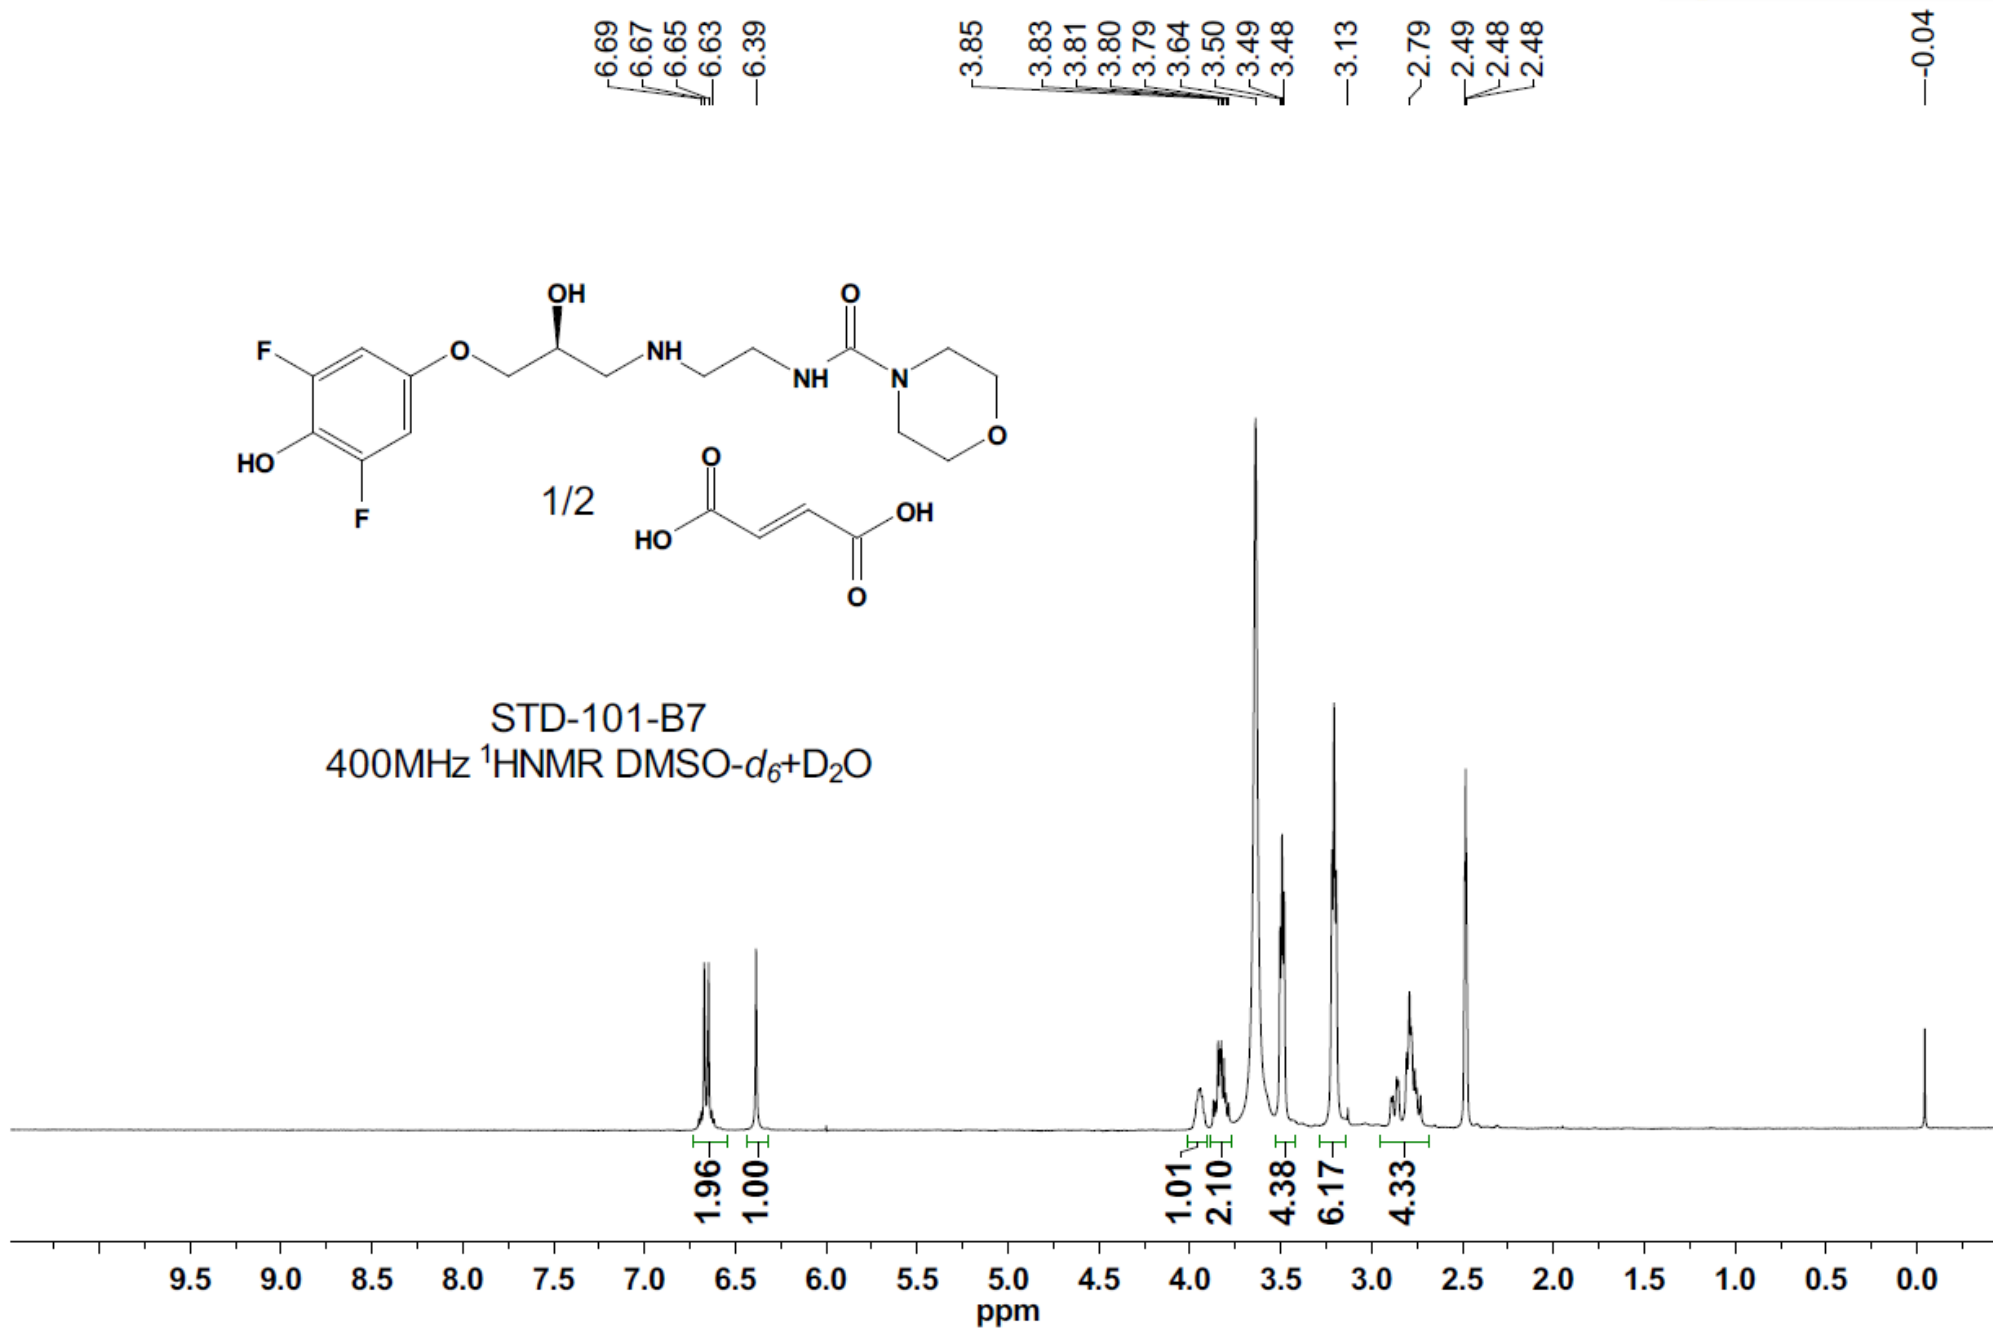

STD-101-B8

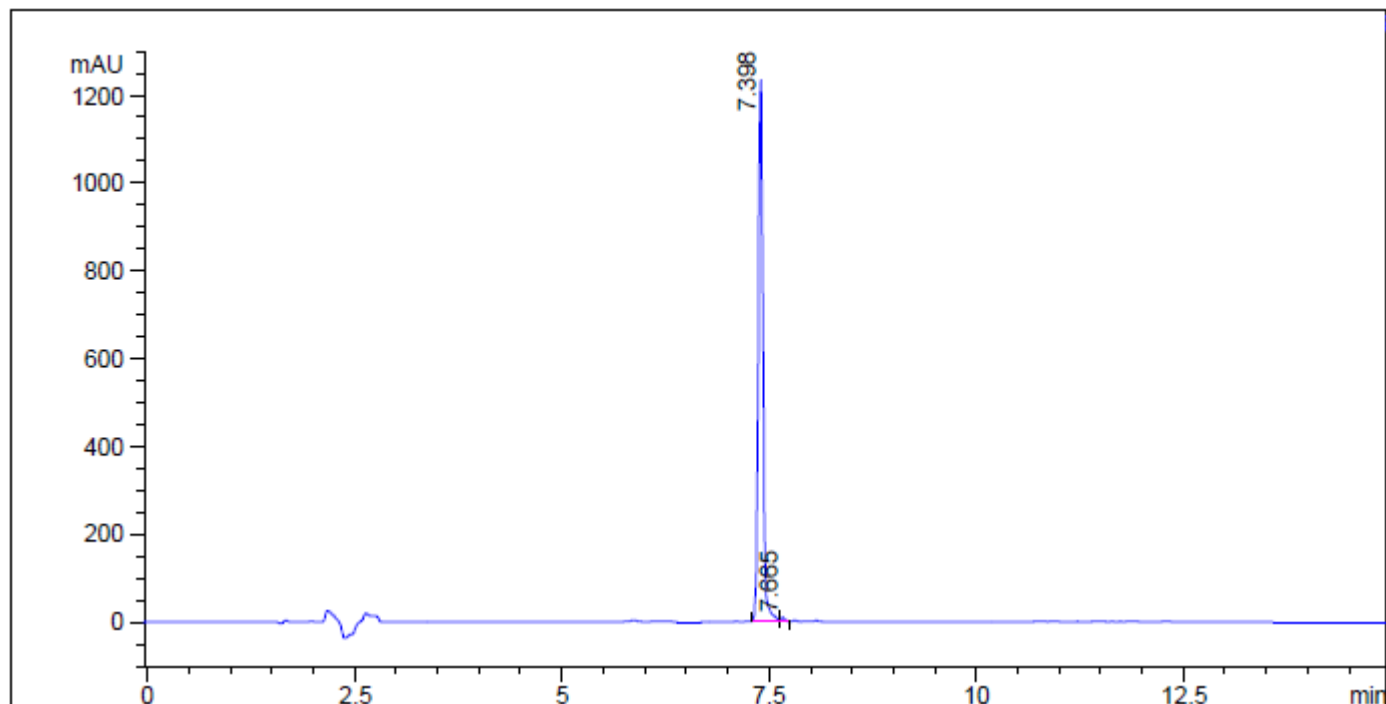

=====  
Area Percent Report  
=====

Signal 1: DAD1 A, Sig=220,16 Ref=off

| Peak # | RT [min] | Type | Width [min] | Height | Area     | Area % |
|--------|----------|------|-------------|--------|----------|--------|
| 1      | 7.398    | BV   | 0.059       | 99.305 | 4771.844 | 99.300 |
| 2      | 7.665    | VB   | 0.057       | 0.695  | 33.639   | 0.700  |

=====

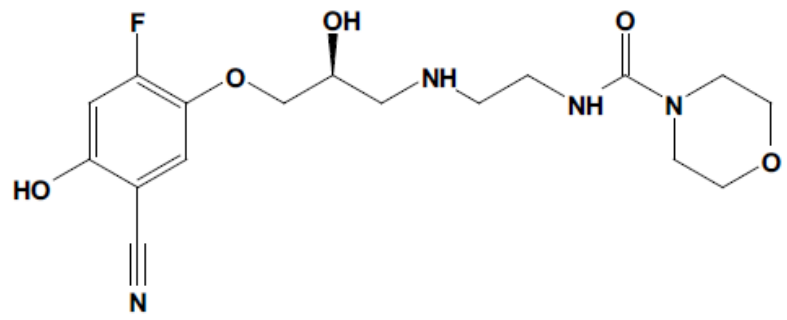

STD-101-B8  
400MHz <sup>1</sup>HNMR DMSO-d<sub>6</sub>

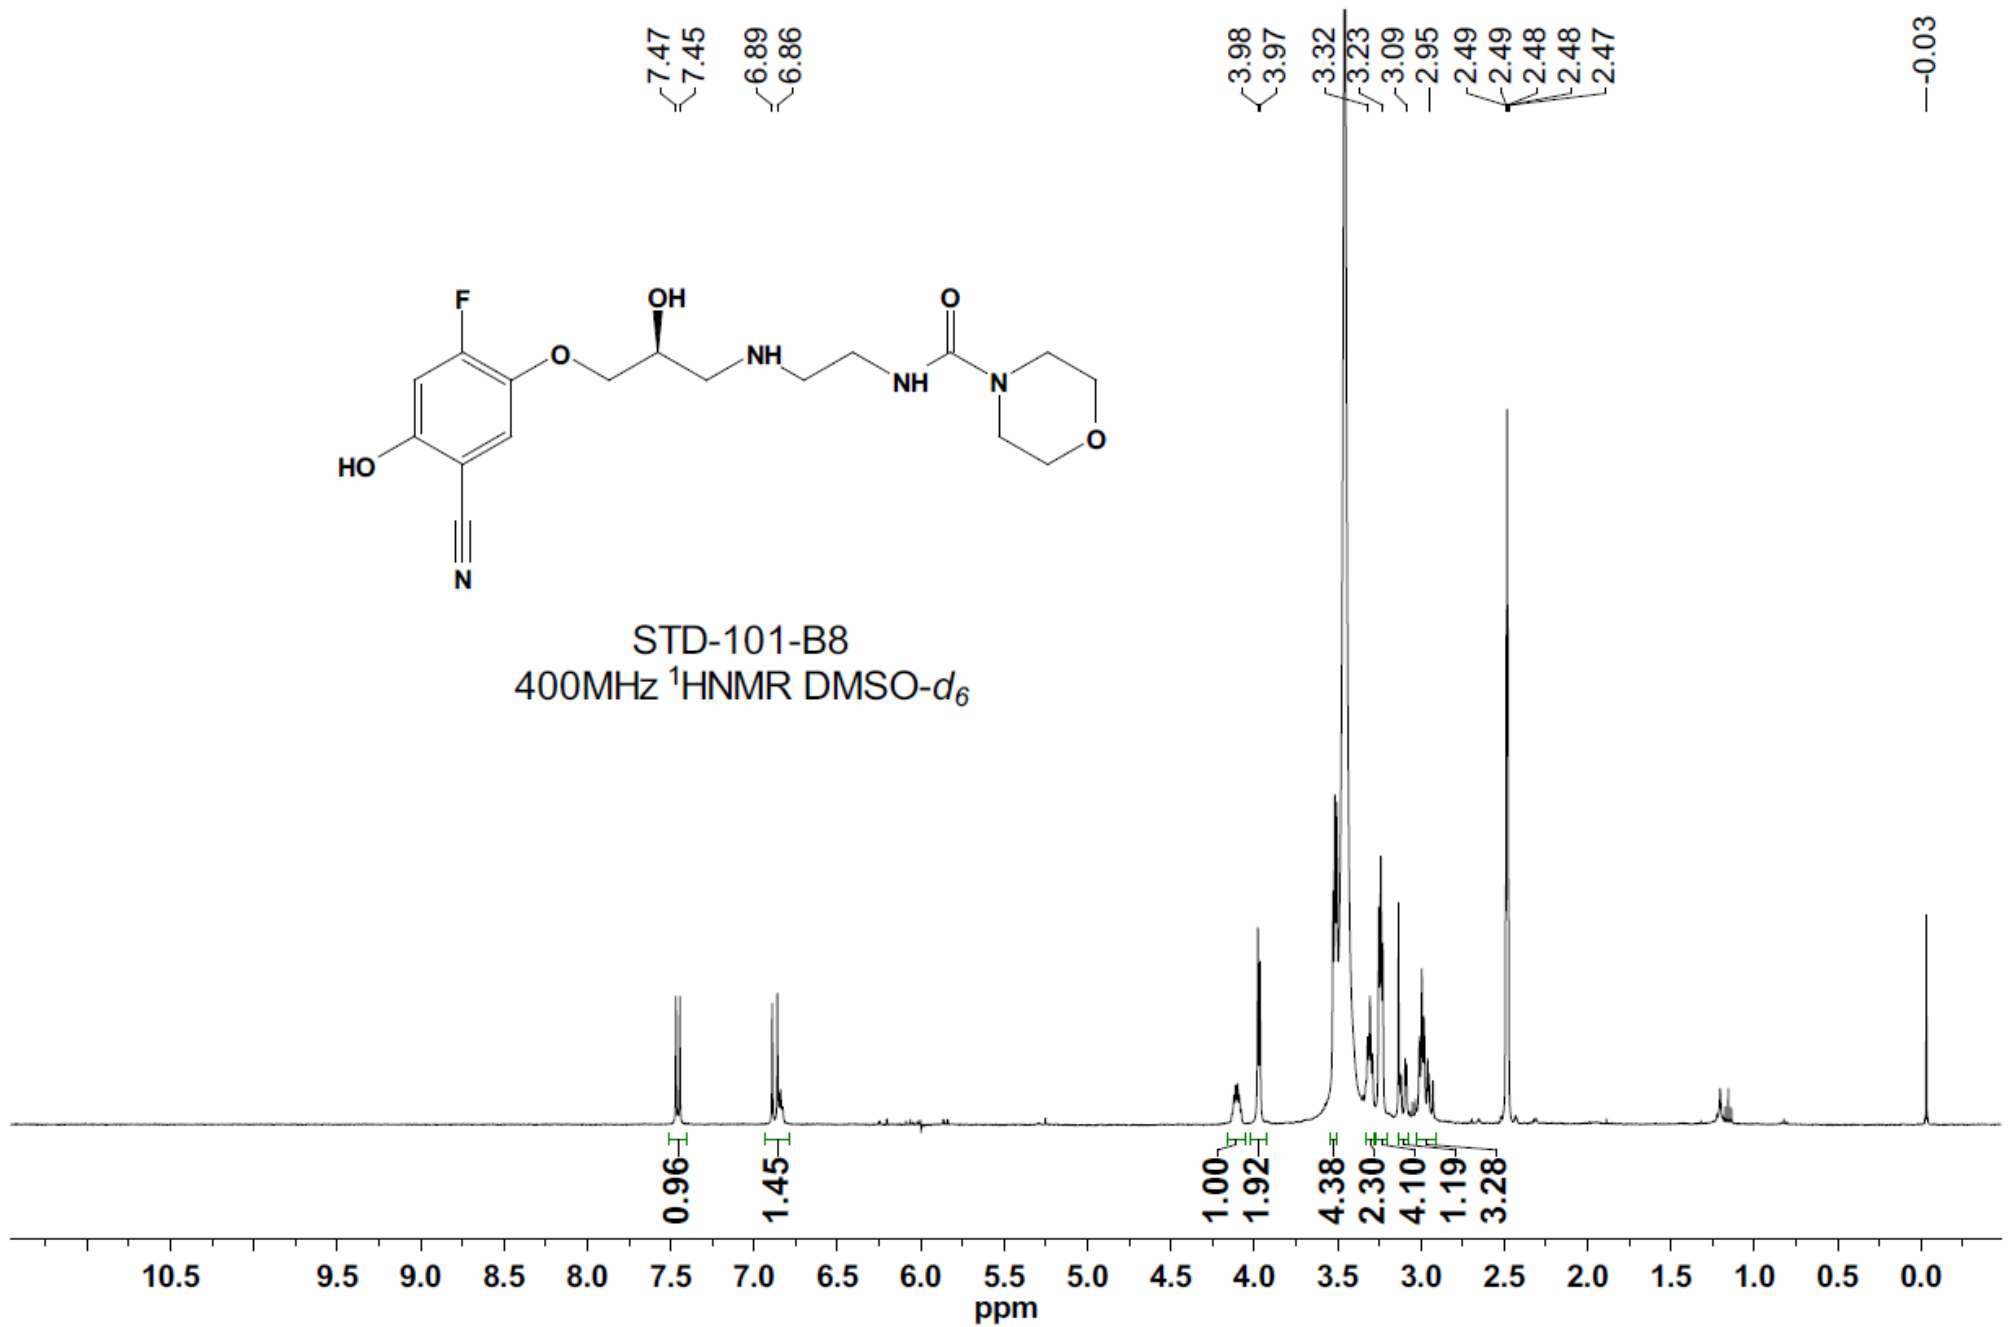

STD-101-B9

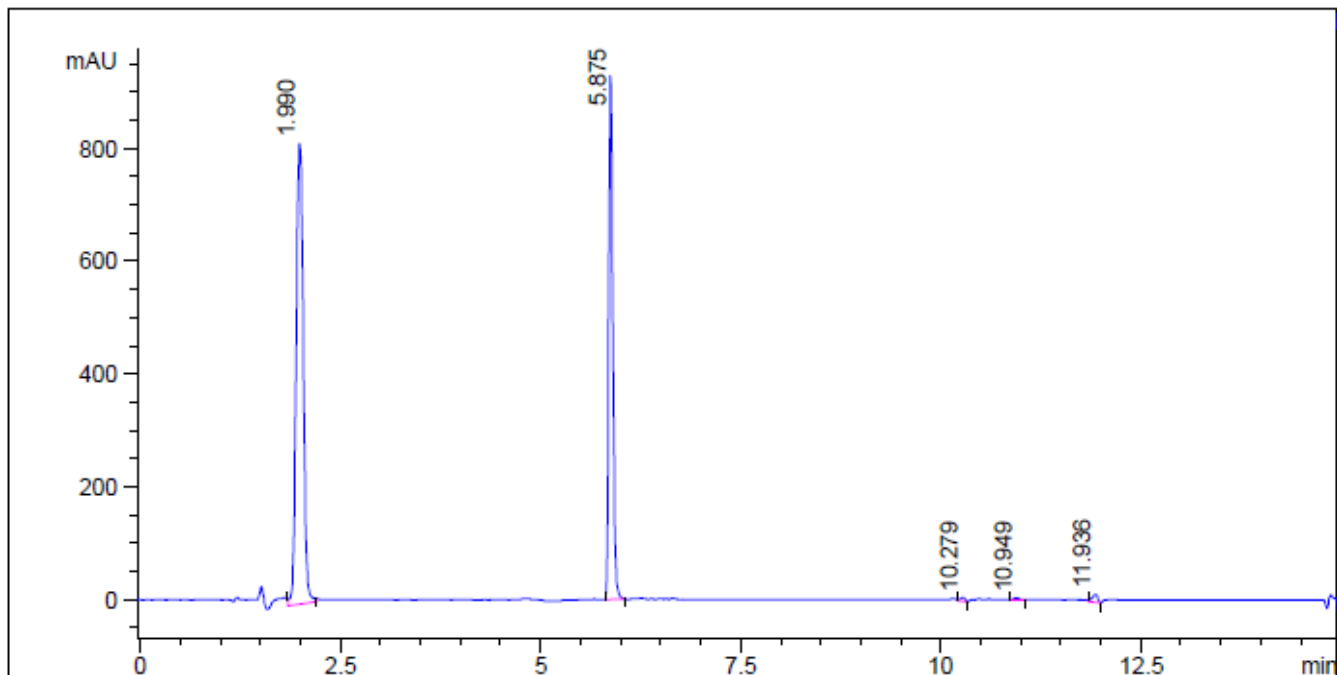

=====  
Area Percent Report  
=====

Signal 1: DAD1 A, Sig=220,16 Ref=off

| Peak # | RT [min] | Type | Width [min] | Height | Area     | Area % |
|--------|----------|------|-------------|--------|----------|--------|
| 1      | 1.990    | VB   | 0.098       | 46.068 | 5066.942 | 59.353 |
| 2      | 5.875    | BB   | 0.058       | 52.609 | 3369.850 | 39.474 |
| 3      | 10.279   | BV   | 0.060       | 0.363  | 24.326   | 0.285  |
| 4      | 10.949   | BB   | 0.057       | 0.167  | 10.283   | 0.120  |
| 5      | 11.936   | BV   | 0.070       | 0.793  | 65.547   | 0.768  |

=====

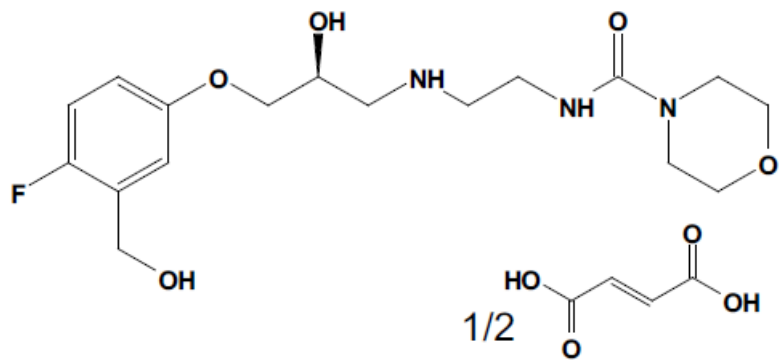

STD-101-B9  
 400MHz  $^1\text{H}$ NMR DMSO- $d_6$ +D $_2$ O

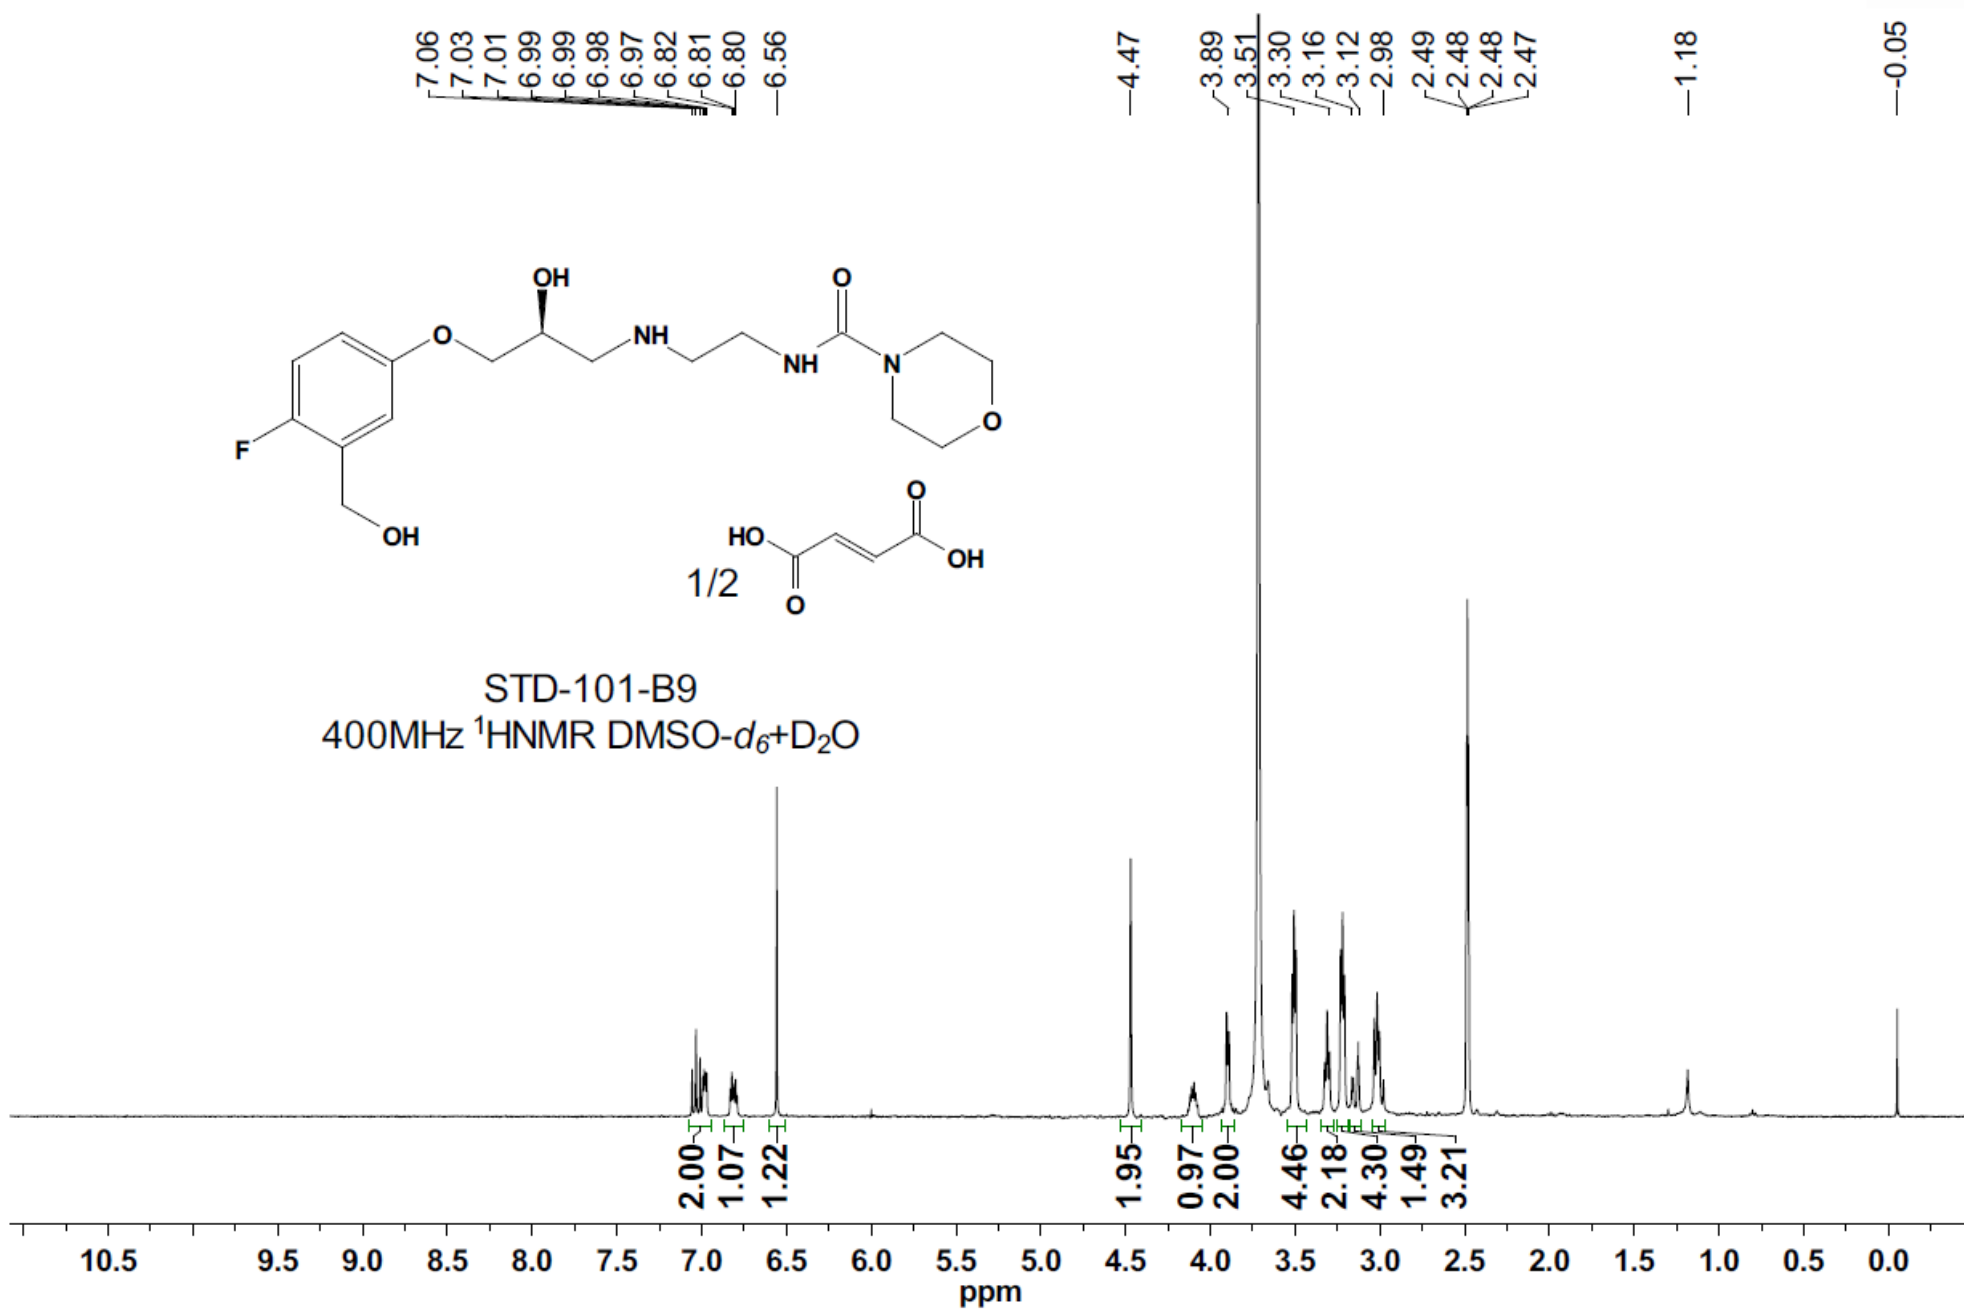

STD-101-E

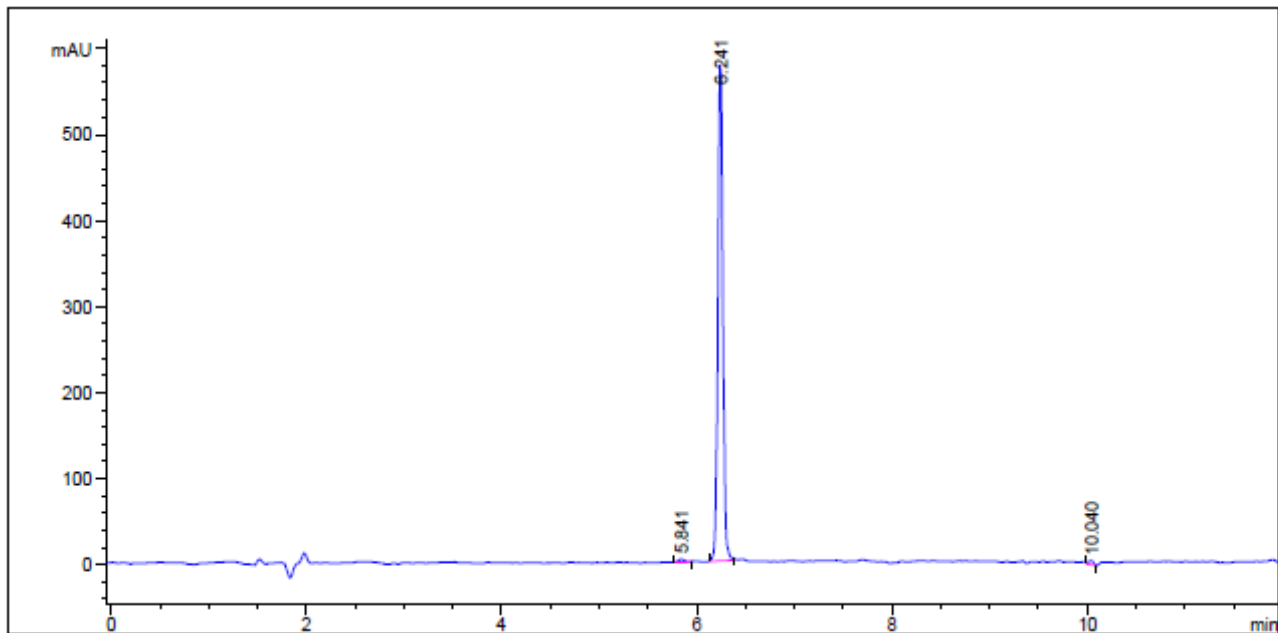

=====  
Area Percent Report  
=====

Signal 1: DAD1 A, Sig=220,4 Ref=off  
Signal has been modified after loading from rawdata file!

| Peak # | RetTime [min] | Type | Width [min] | Area [mAU*s] | Height [mAU] | Area %  |
|--------|---------------|------|-------------|--------------|--------------|---------|
| 1      | 5.841         | BB   | 0.0694      | 16.18991     | 3.40852      | 0.7785  |
| 2      | 6.241         | BB   | 0.0553      | 2045.86768   | 578.03595    | 98.3760 |
| 3      | 10.040        | BV   | 0.0566      | 17.58346     | 4.81107      | 0.8455  |

Totals :                    2079.64105   586.25554  
=====

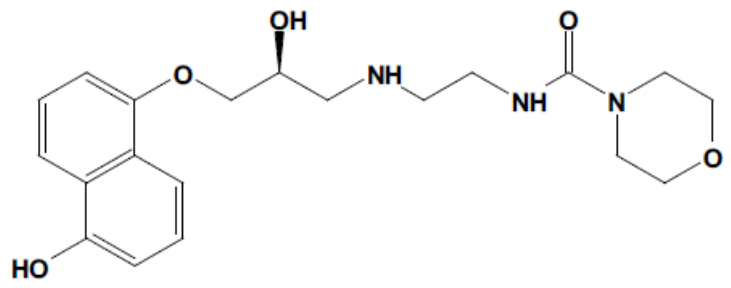

STD-101-E  
400MHz <sup>1</sup>HNMR DMSO-d<sub>6</sub>+D<sub>2</sub>O

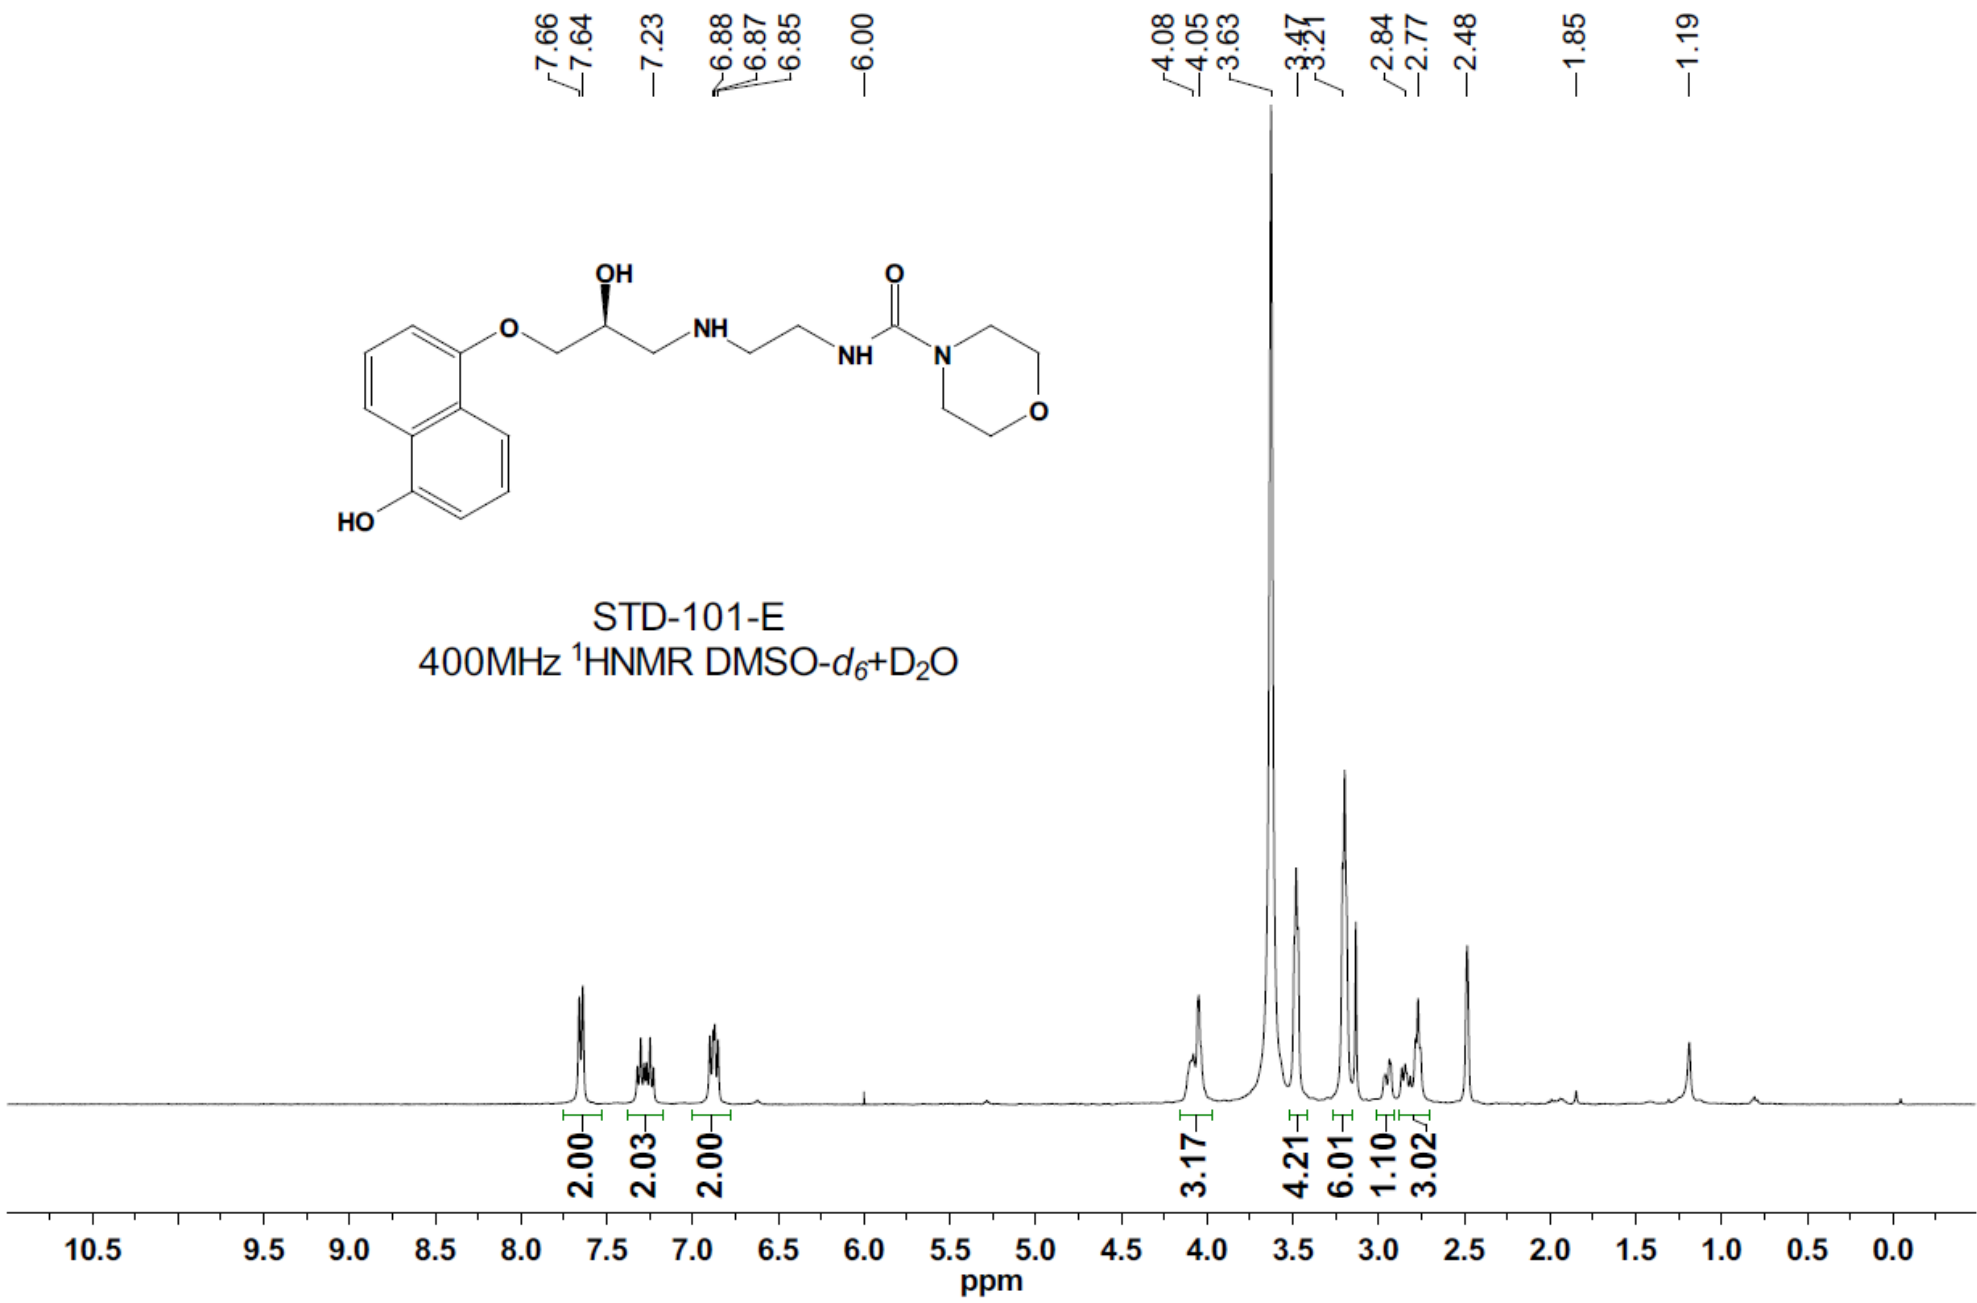



STD-101-D1

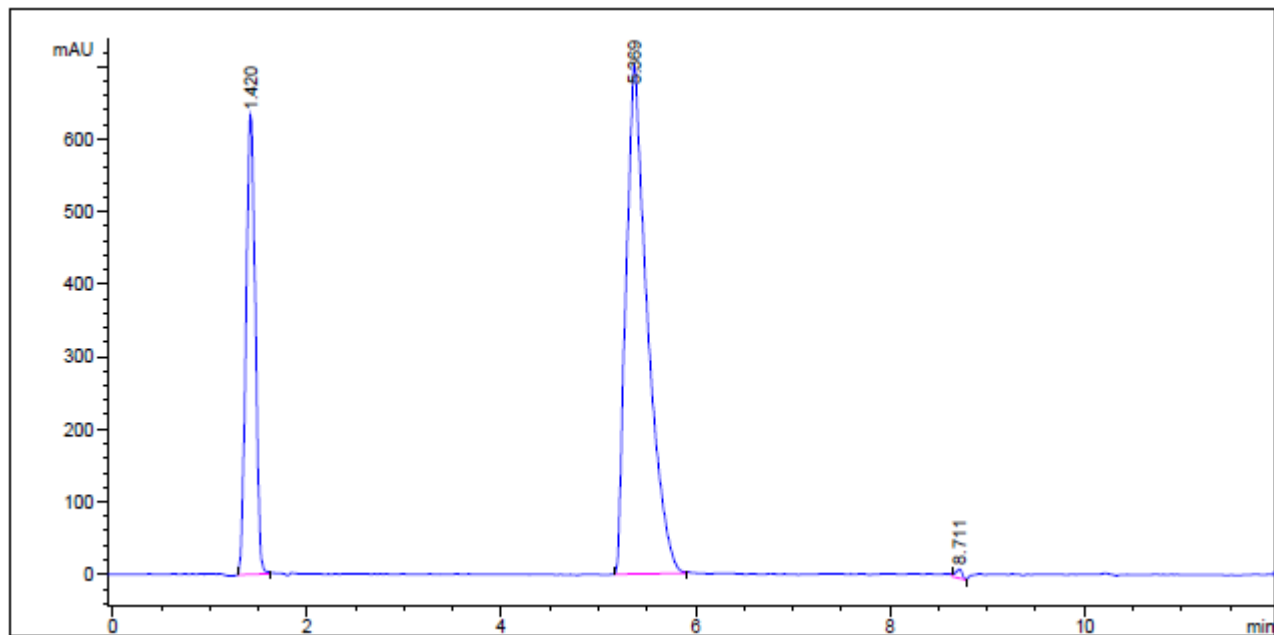

=====  
 Area Percent Report  
 =====

Signal 1: DAD1 A, Sig=220,4 Ref=off

Signal has been modified after loading from rawdata file!

| Peak # | RetTime [min] | Type | Width [min] | Area [mAU*s] | Height [mAU] | Area %  |
|--------|---------------|------|-------------|--------------|--------------|---------|
| 1      | 1.420         | BB   | 0.1055      | 4196.78760   | 632.01465    | 28.0859 |
| 2      | 5.369         | BB   | 0.1996      | 1.06888e4    | 702.07568    | 71.5323 |
| 3      | 8.711         | BV   | 0.0719      | 57.04675     | 12.34177     | 0.3818  |

Totals :                    1.49427e4  1346.43210

=====

6.97  
6.94  
6.92  
6.91  
6.89  
6.87  
6.85  
6.74  
6.72  
6.66  
6.63  
6.42

4.09  
4.08  
4.07  
3.96  
3.81  
3.79  
3.71  
3.67  
2.83  
2.78  
2.48  
1.95  
-0.04

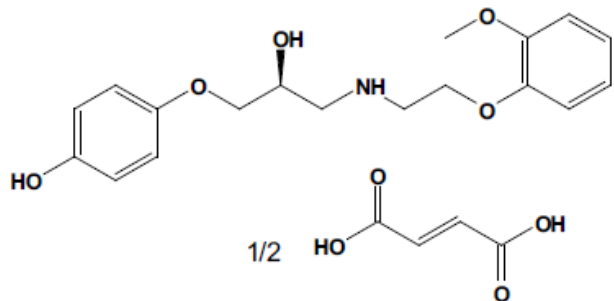

STD-101-D1  
400MHz  $^1\text{H}$ NMR  $\text{DMSO-}d_6 + \text{D}_2\text{O}$

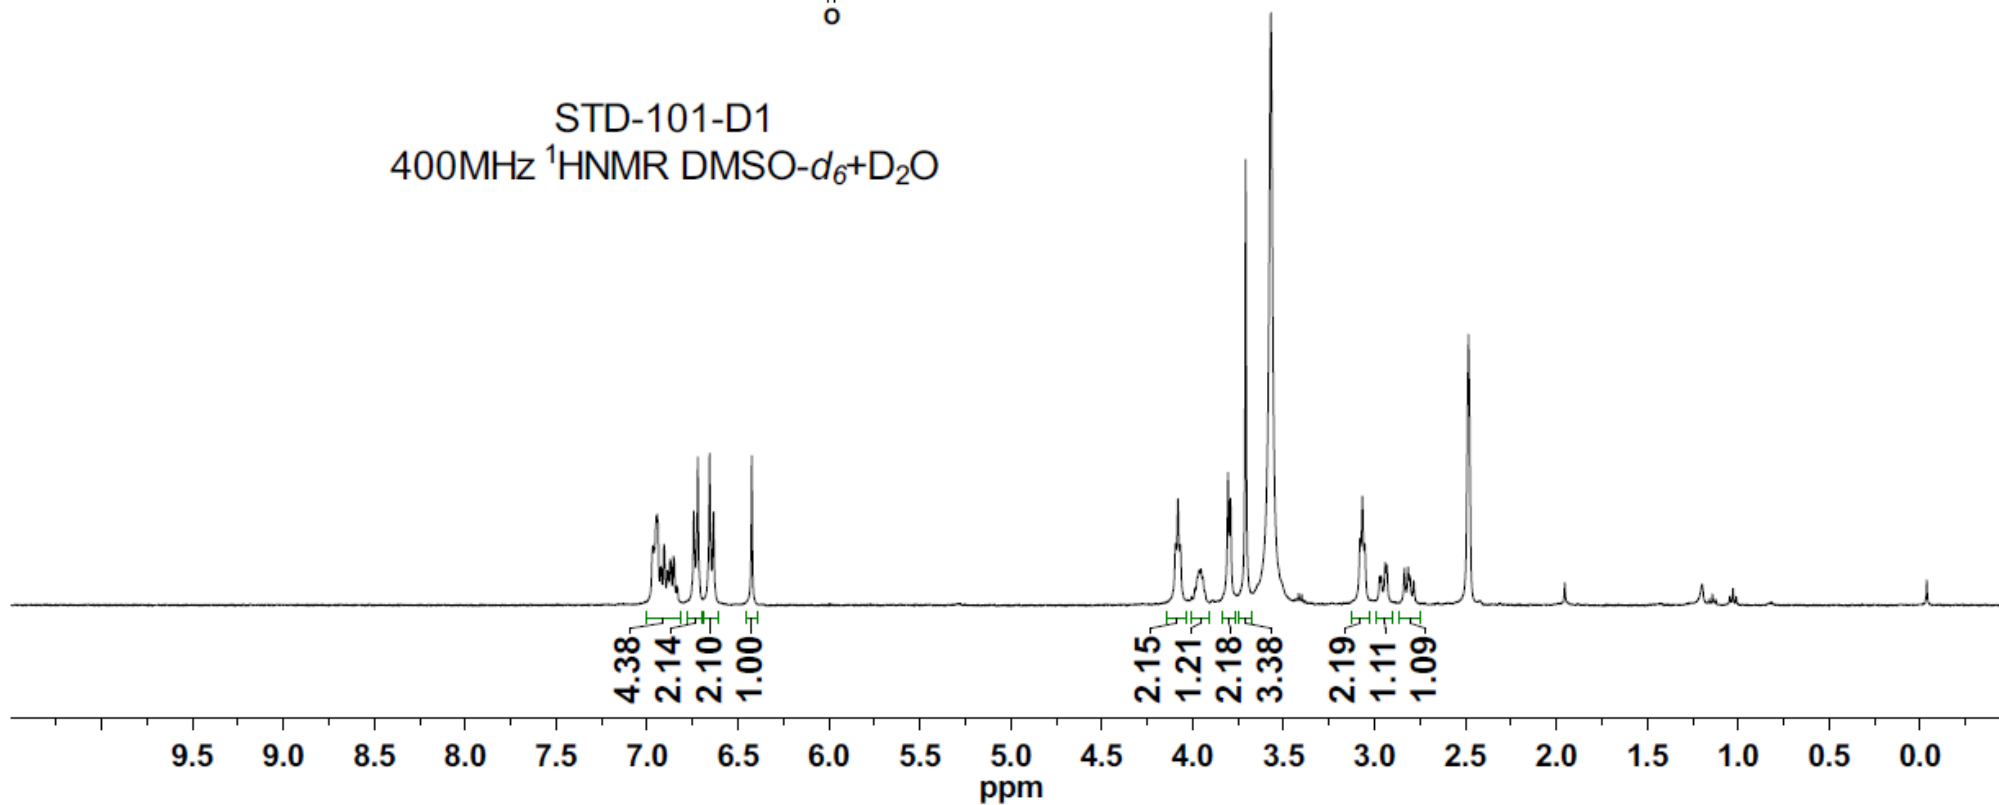

STD-101-D2

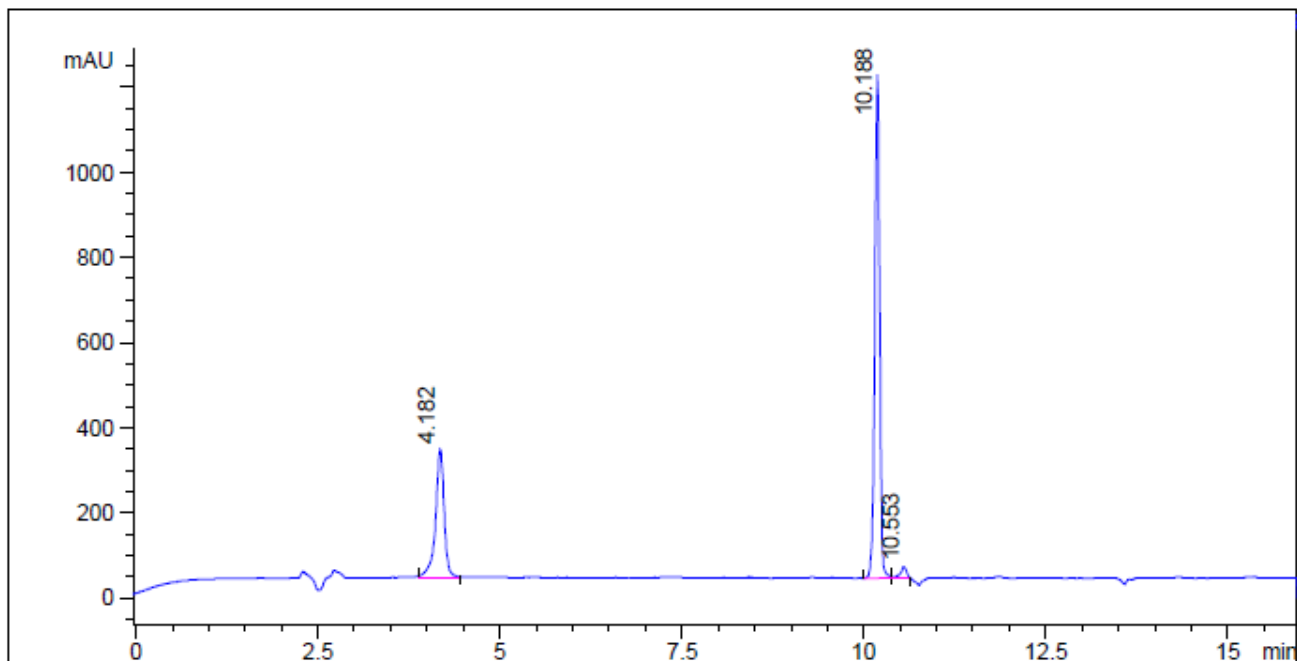

=====  
Area Percent Report  
=====

Signal 1: DAD1 A, Sig=220,16 Ref=off

| Peak # | RT [min] | Type | Width [min] | Height | Area     | Area % |
|--------|----------|------|-------------|--------|----------|--------|
| 1      | 4.182    | BB   | 0.125       | 19.850 | 2489.435 | 30.895 |
| 2      | 10.188   | MF R | 0.076       | 78.427 | 5413.867 | 67.189 |
| 3      | 10.553   | FM R | 0.099       | 1.723  | 154.410  | 1.916  |

=====

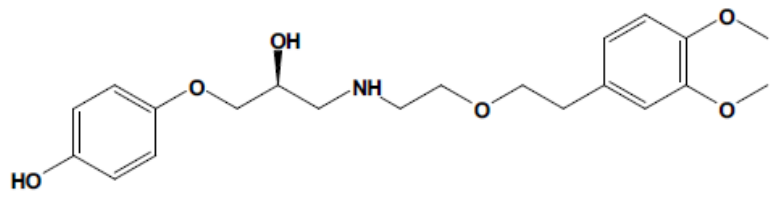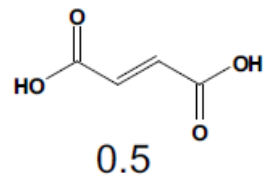

STD-101-D2  
400MHz <sup>1</sup>HNMR DMSO-d<sub>6</sub>+D<sub>2</sub>O

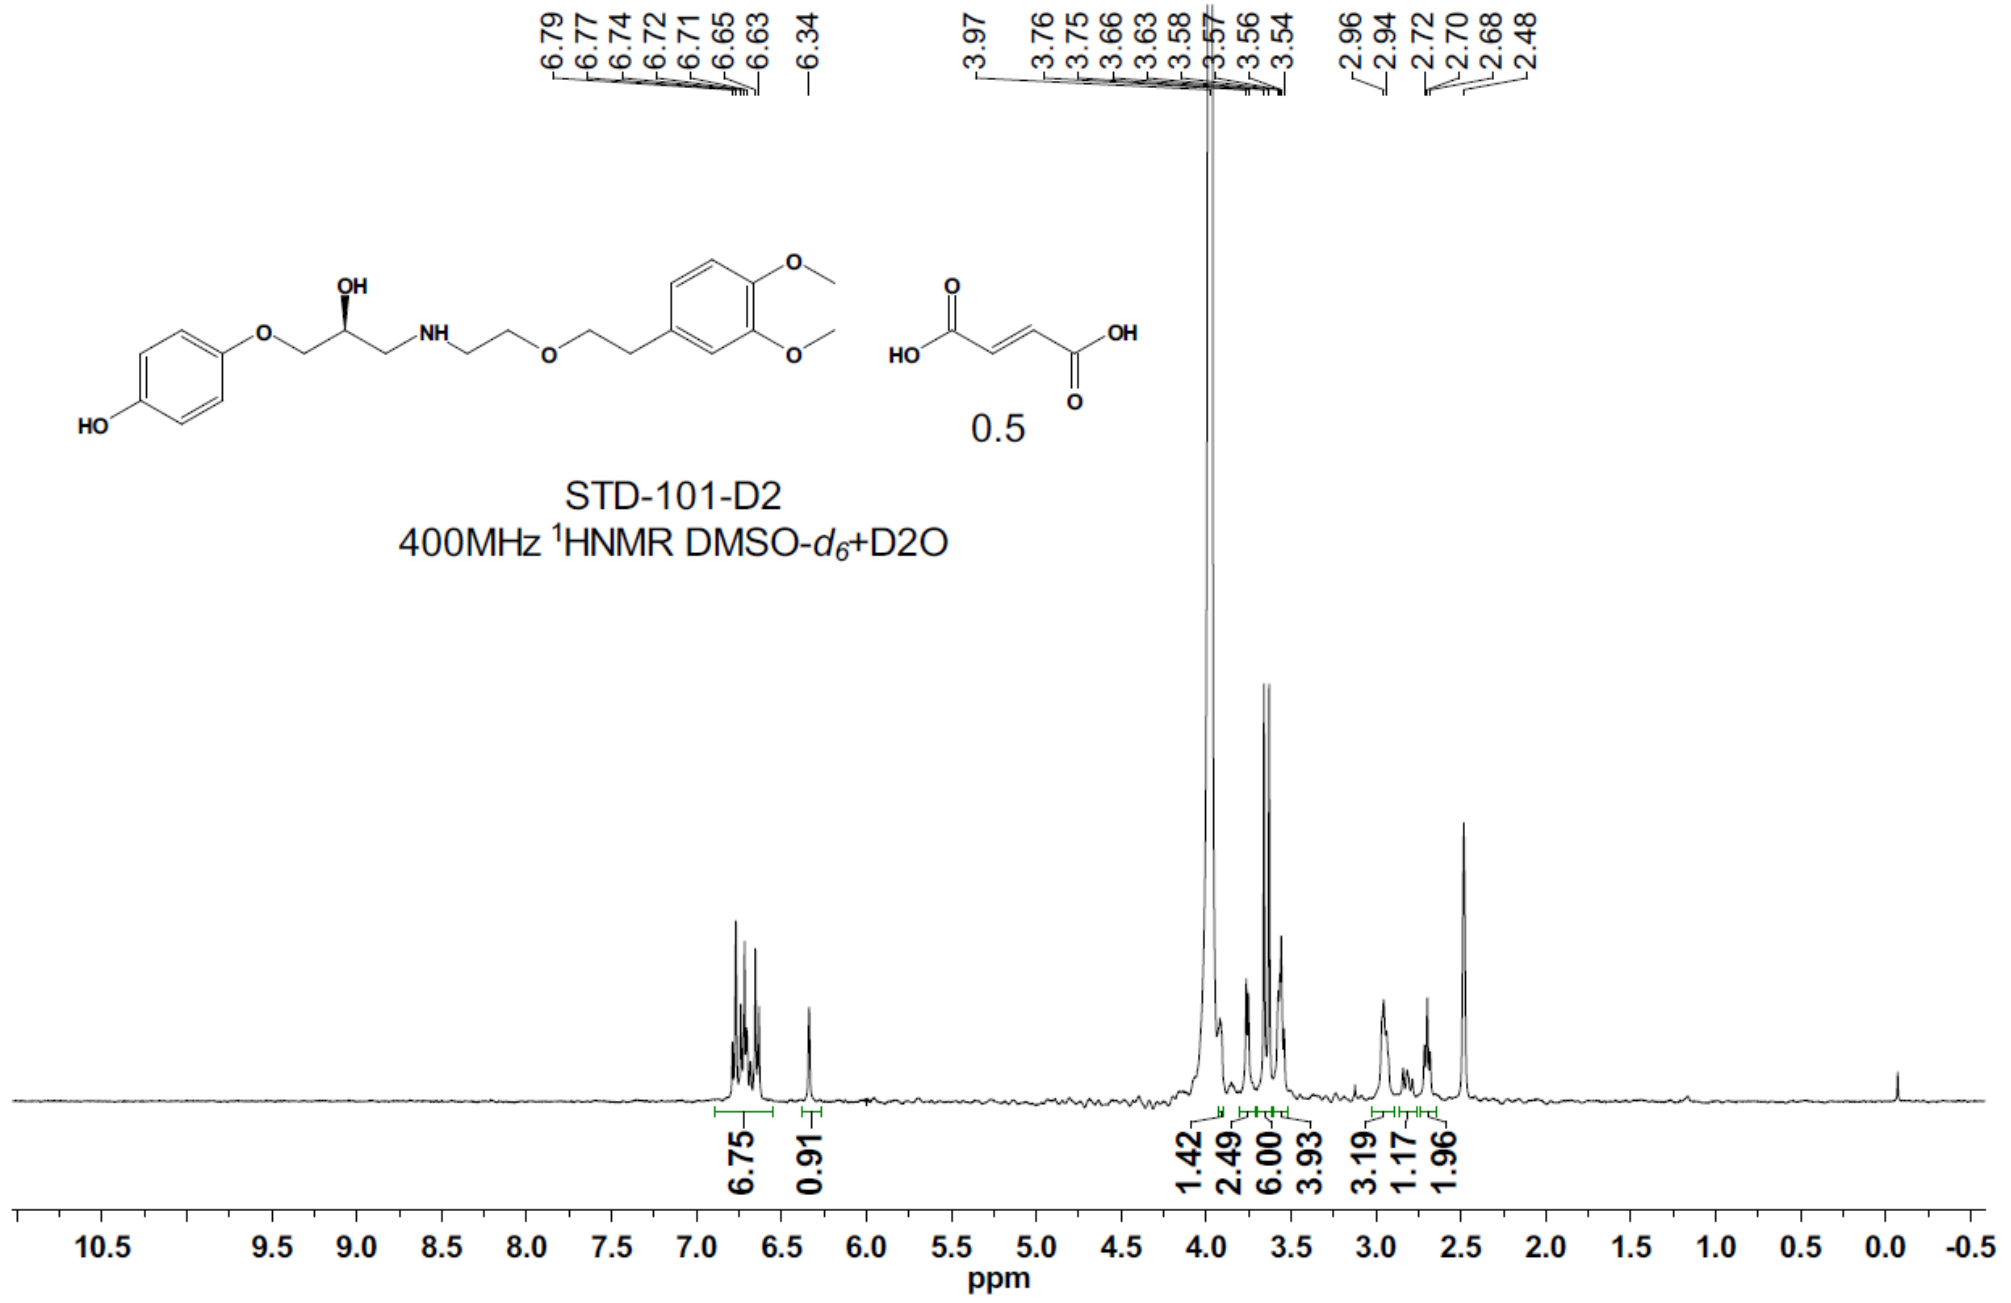

STD-101-D3

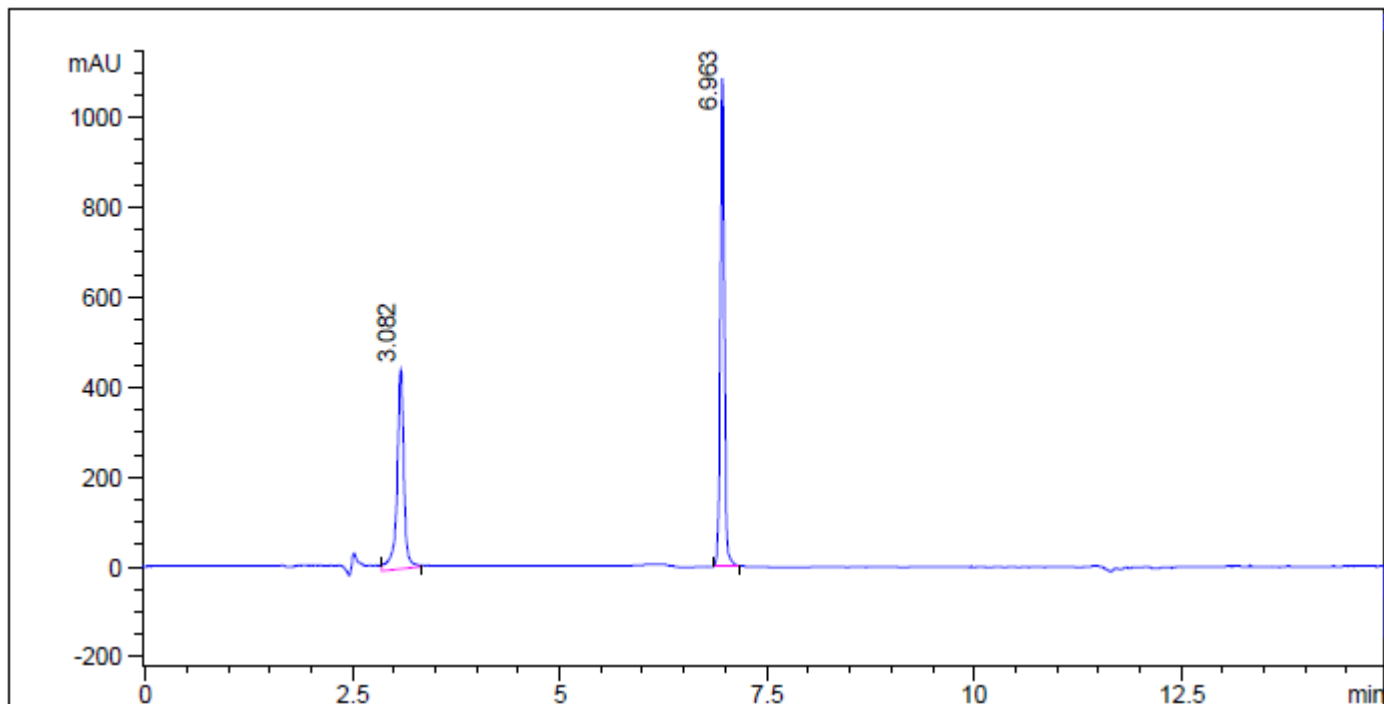

=====  
Area Percent Report  
=====

Signal 1: DAD1 A, Sig=220,16 Ref=off

| Peak # | RT [min] | Type | Width [min] | Height | Area     | Area % |
|--------|----------|------|-------------|--------|----------|--------|
| 1      | 3.082    | BB   | 0.086       | 28.926 | 2594.402 | 40.346 |
| 2      | 6.963    | BB   | 0.055       | 71.074 | 3835.935 | 59.654 |

=====  
=====

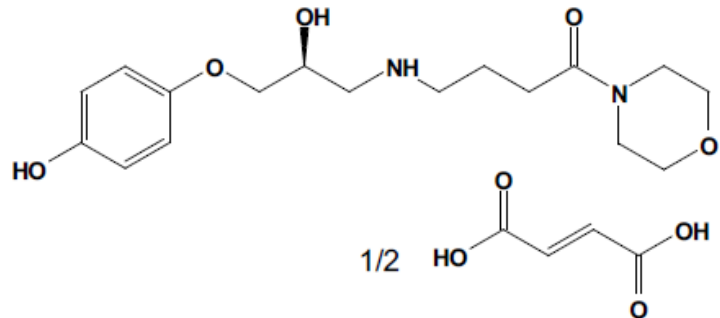

STD-101-D3  
400MHz <sup>1</sup>HNMR DMSO-d<sub>6</sub>+D<sub>2</sub>O

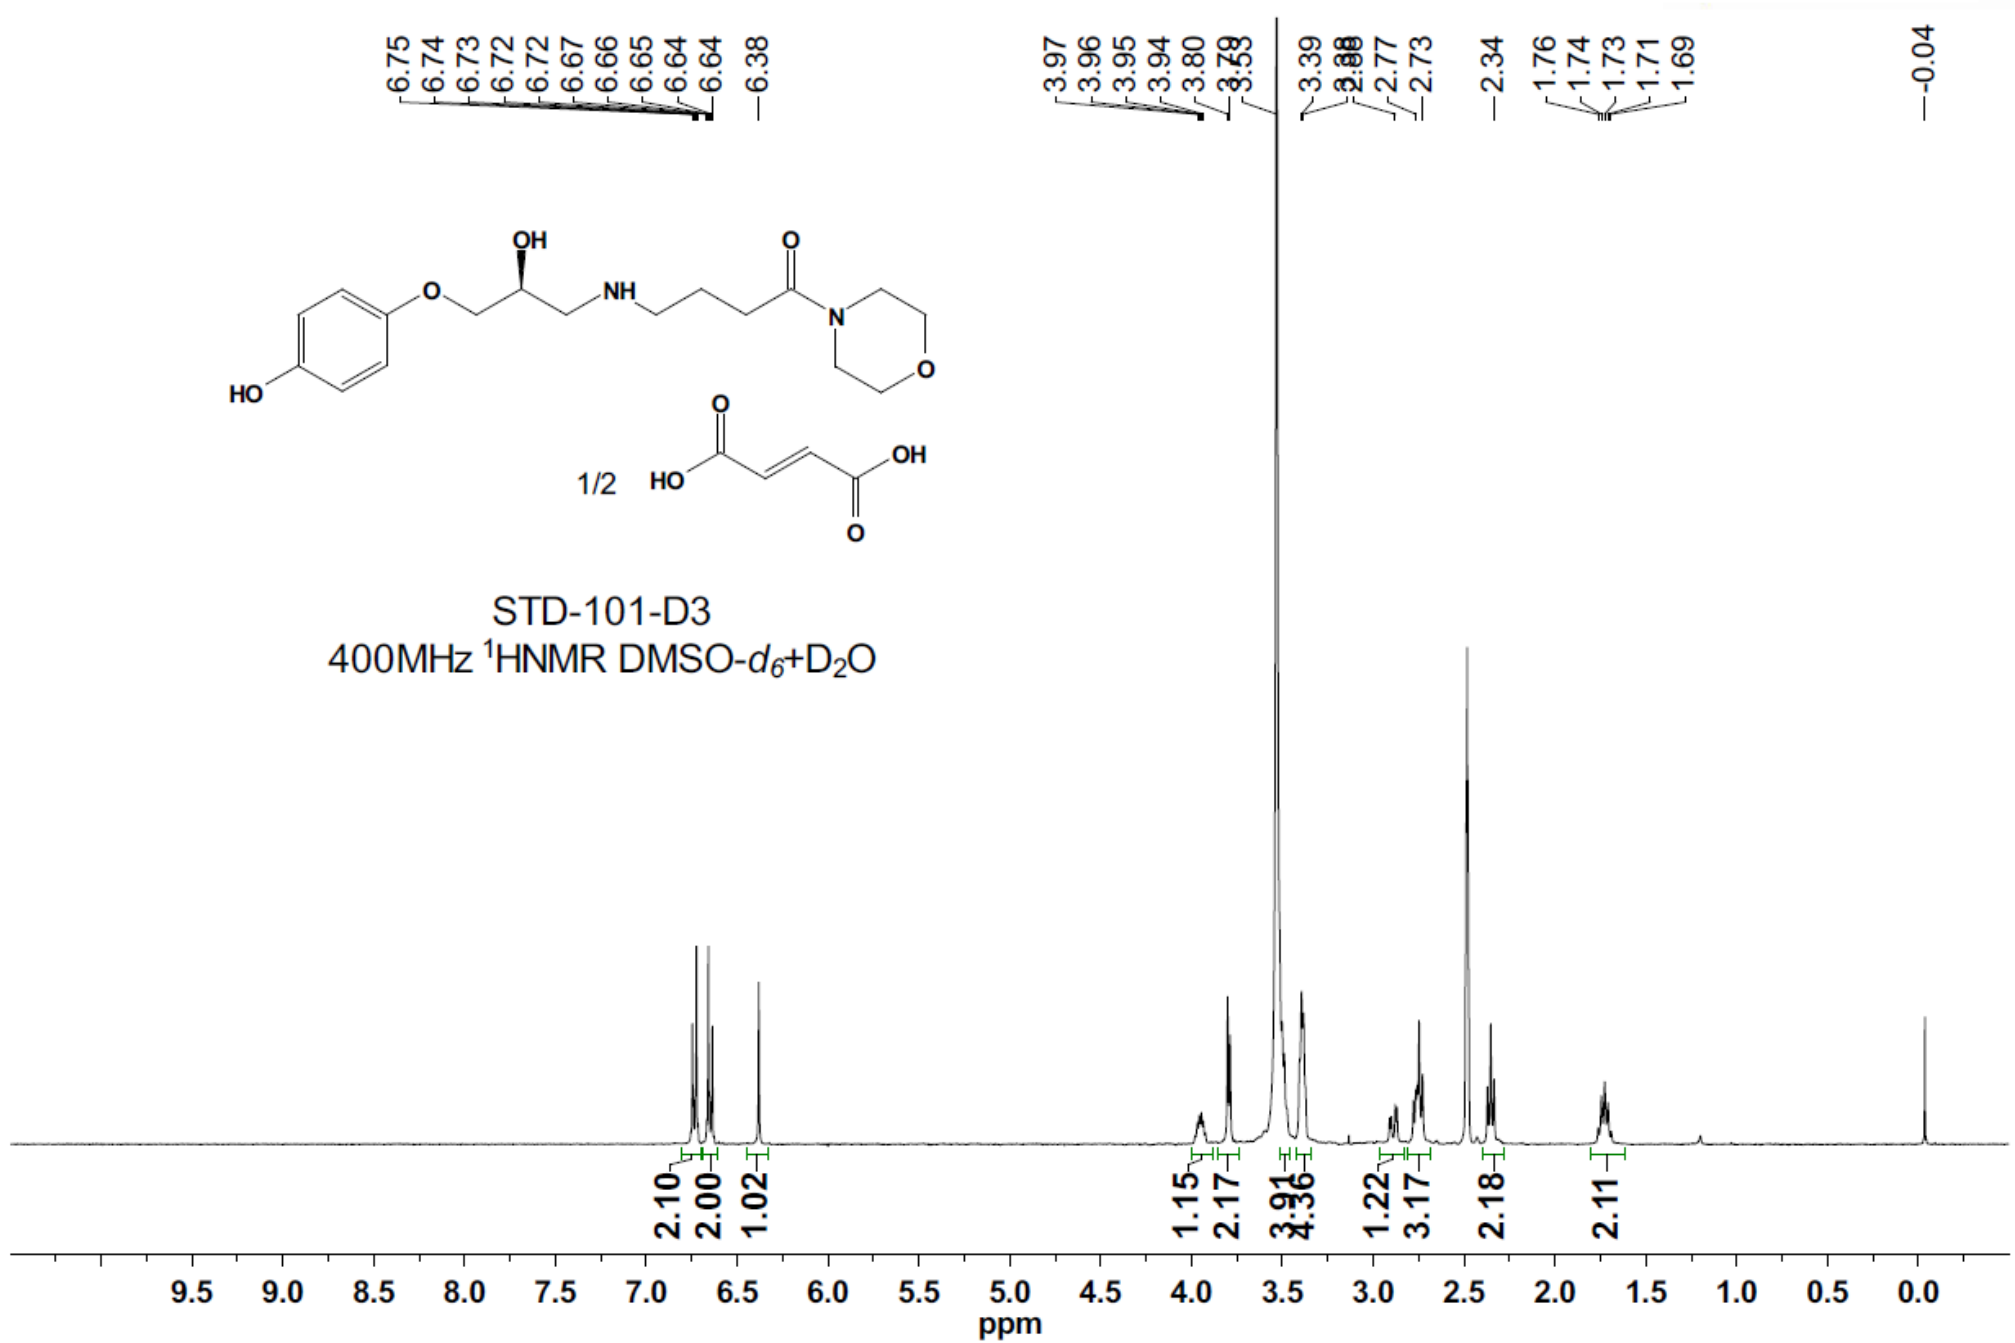

STD-101-D4

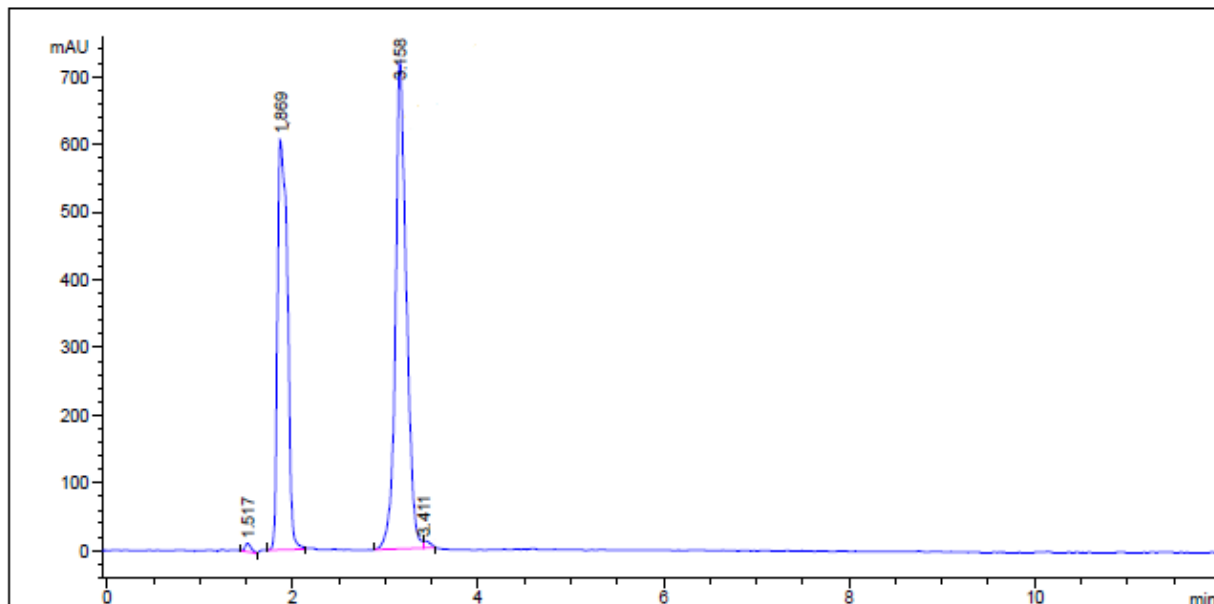

=====  
Area Percent Report  
=====

Signal 1: DAD1 A, Sig=220,4 Ref=off  
Signal has been modified after loading from rawdata file!

| Peak # | RetTime [min] | Type | Width [min] | Area [mAU*s] | Height [mAU] | Area %  |
|--------|---------------|------|-------------|--------------|--------------|---------|
| 1      | 1.517         | BV   | 0.0678      | 55.64667     | 12.53394     | 0.5295  |
| 2      | 1.869         | MM   | 0.1237      | 4505.24902   | 607.06256    | 42.8670 |
| 3      | 3.158         | MF   | 0.1366      | 5901.18799   | 719.83838    | 56.1492 |
| 4      | 3.411         | FM   | 0.0794      | 47.75102     | 10.02919     | 0.4543  |

Totals :                   1.05098e4 1349.46407  
=====

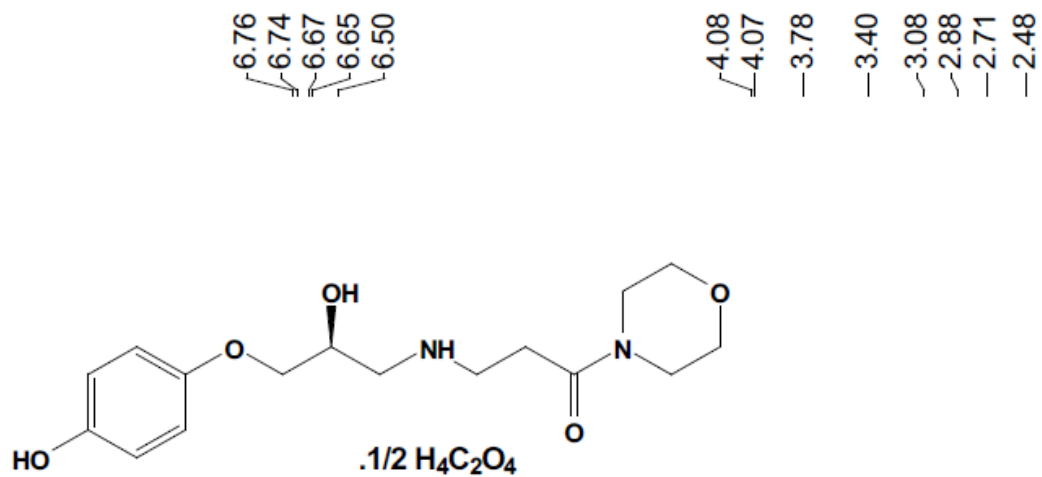

STD-103-D4  
400MHz  $^1\text{H}$ NMR DMSO- $d_6$

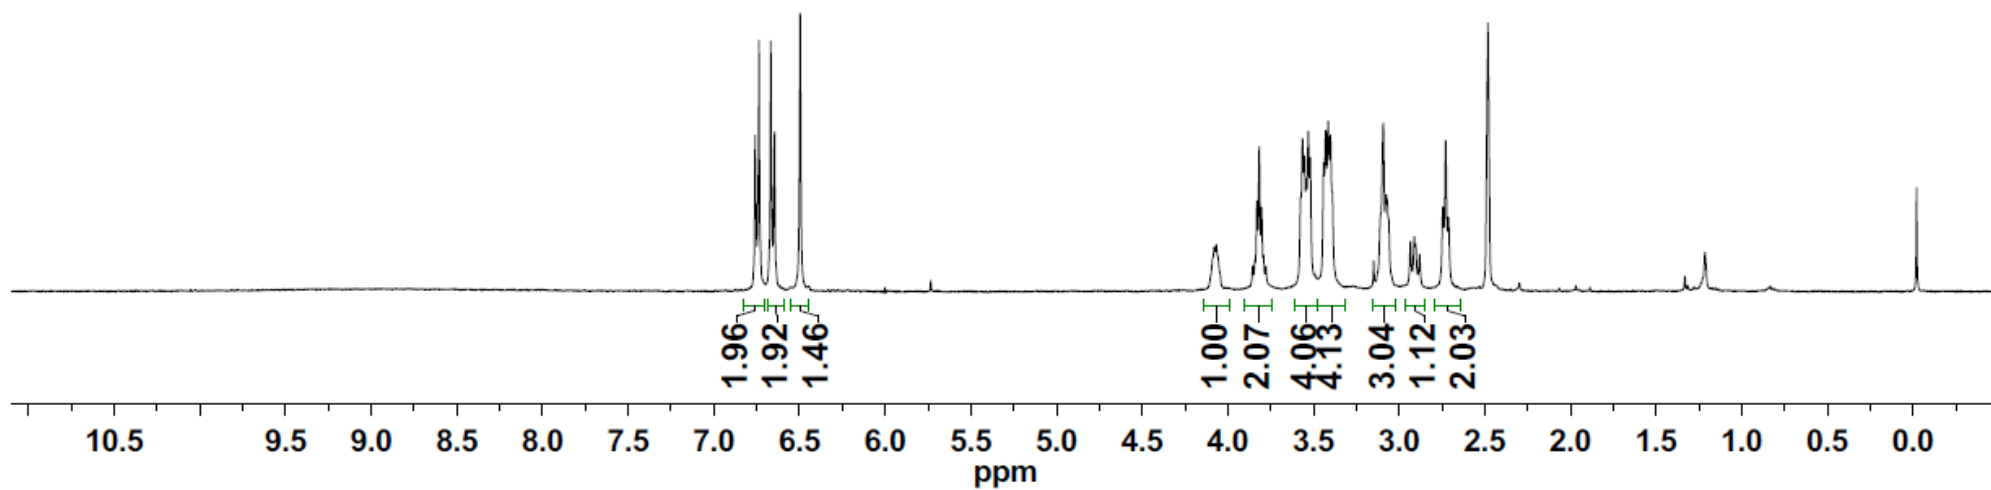



STD-101-D5

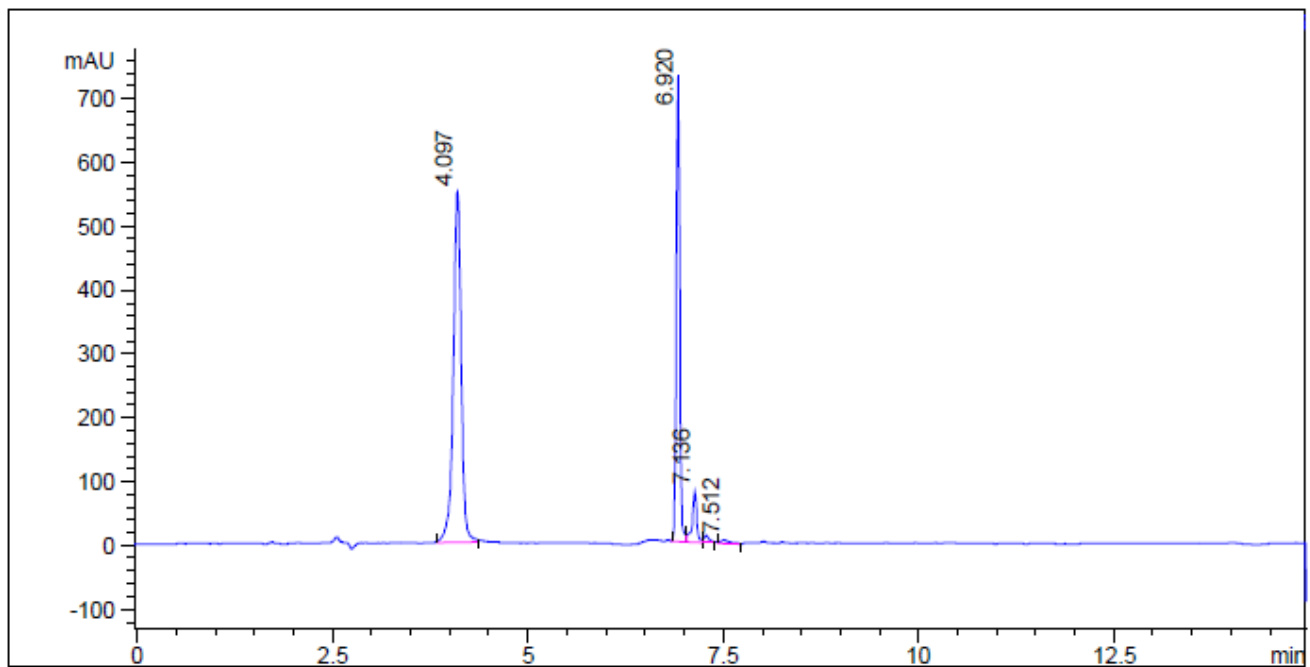

=====  
Area Percent Report  
=====

Signal 1: DAD1 A, Sig=220,16 Ref=off

| Peak # | RT [min] | Type | Width [min] | Height | Area     | Area % |
|--------|----------|------|-------------|--------|----------|--------|
| 1      | 4.097    | BB   | 0.109       | 39.793 | 3890.943 | 58.817 |
| 2      | 6.920    | BV   | 0.051       | 53.120 | 2302.392 | 34.804 |
| 3      | 7.136    | VB   | 0.059       | 5.819  | 321.795  | 4.864  |
| 4      | 7.283    | BB   | 0.066       | 0.864  | 55.078   | 0.833  |
| 5      | 7.512    | BB   | 0.108       | 0.405  | 45.119   | 0.682  |

=====

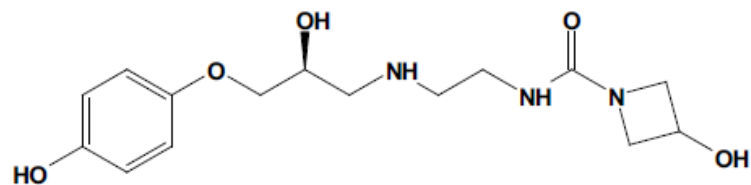

. 1/2 H<sub>4</sub>C<sub>2</sub>O<sub>4</sub>

STD-101-D5  
400MHz <sup>1</sup>HNMR DMSO-*d*<sub>6</sub>

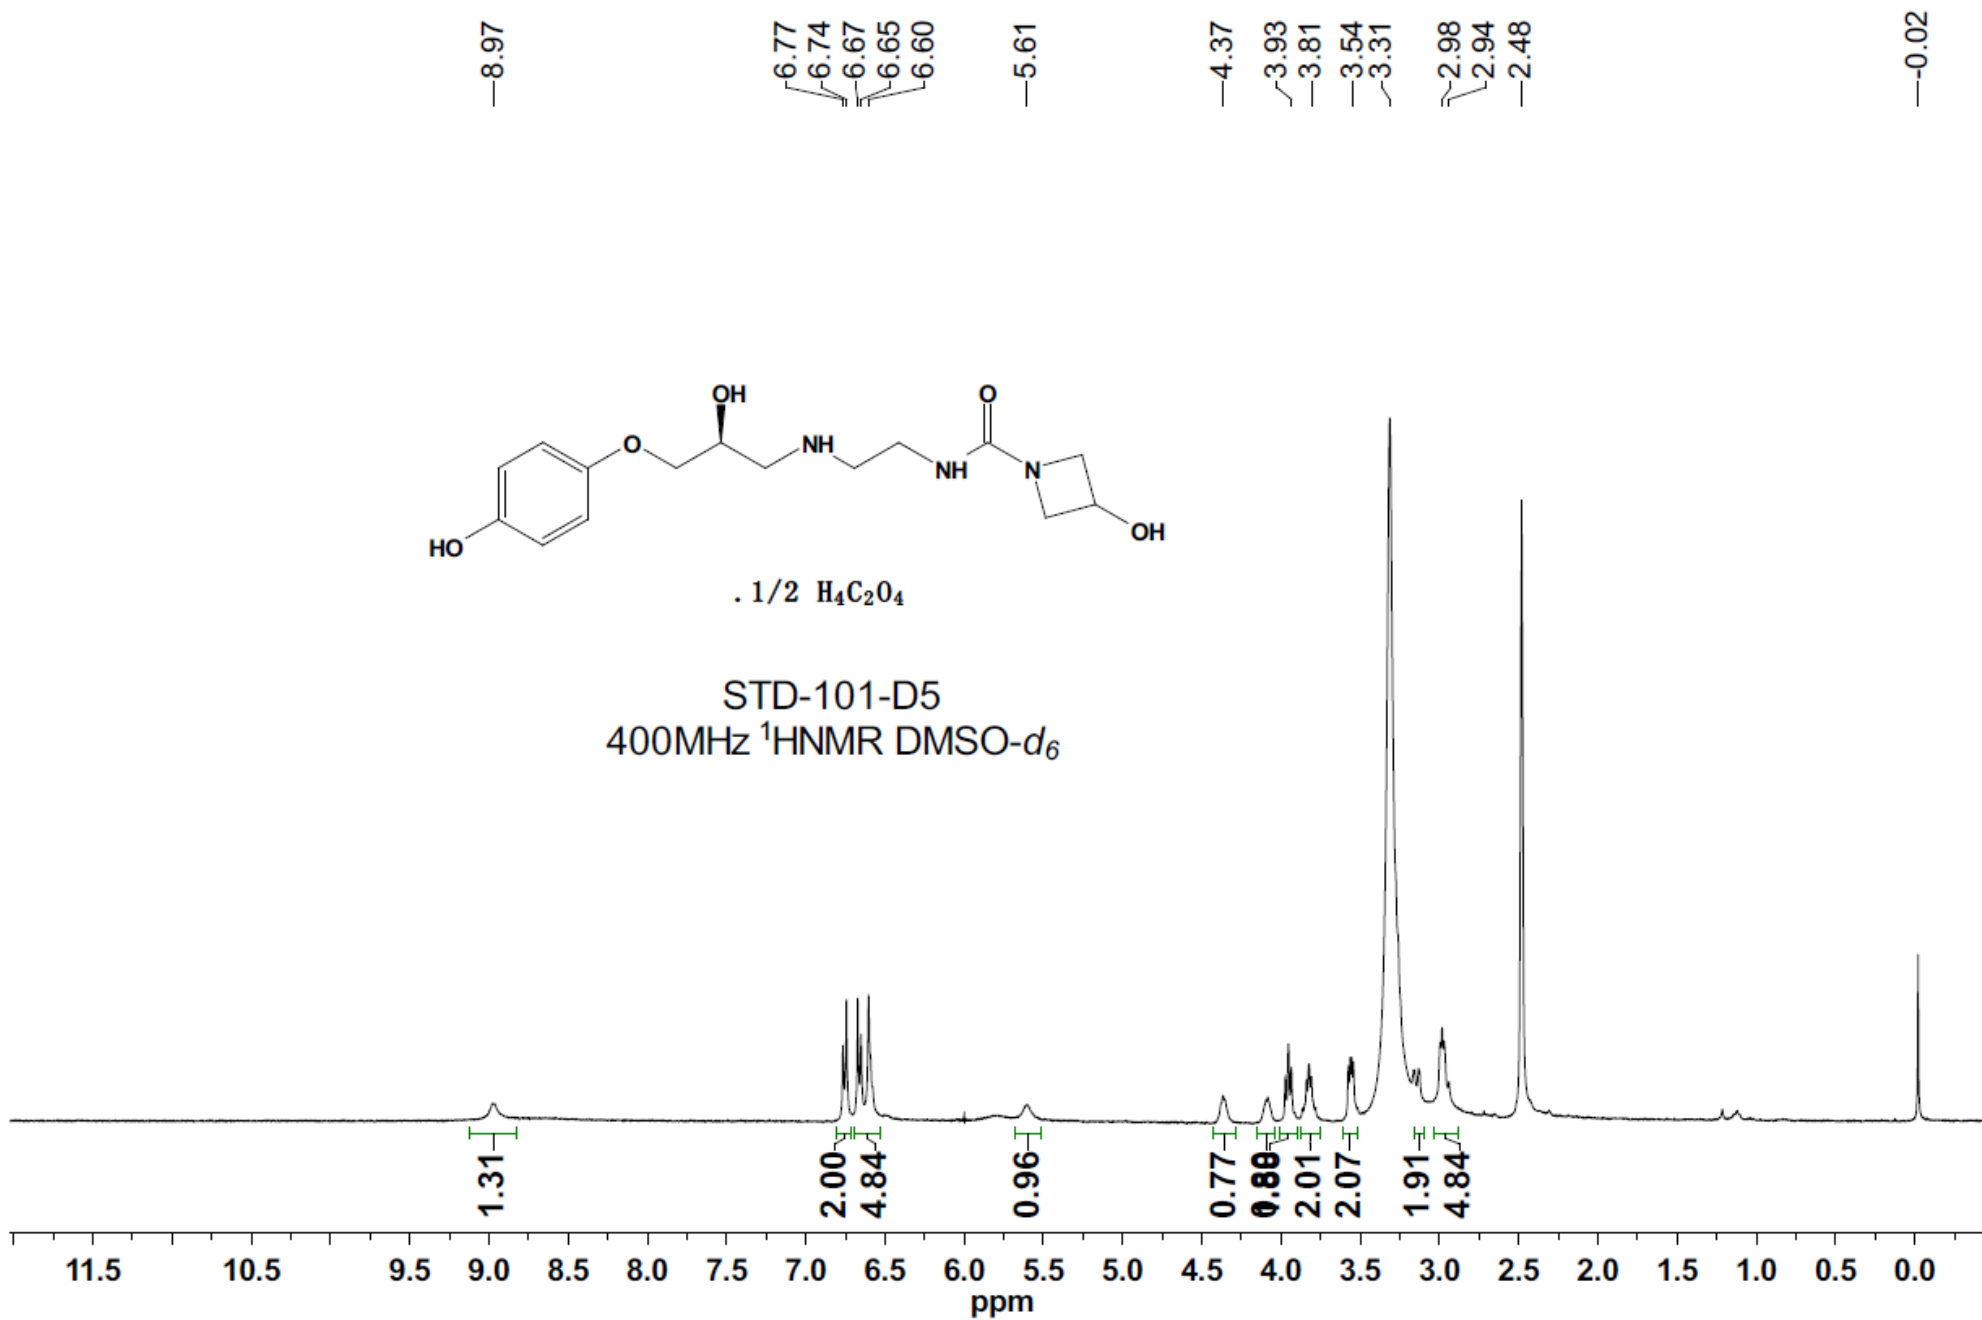

STD-101-D6

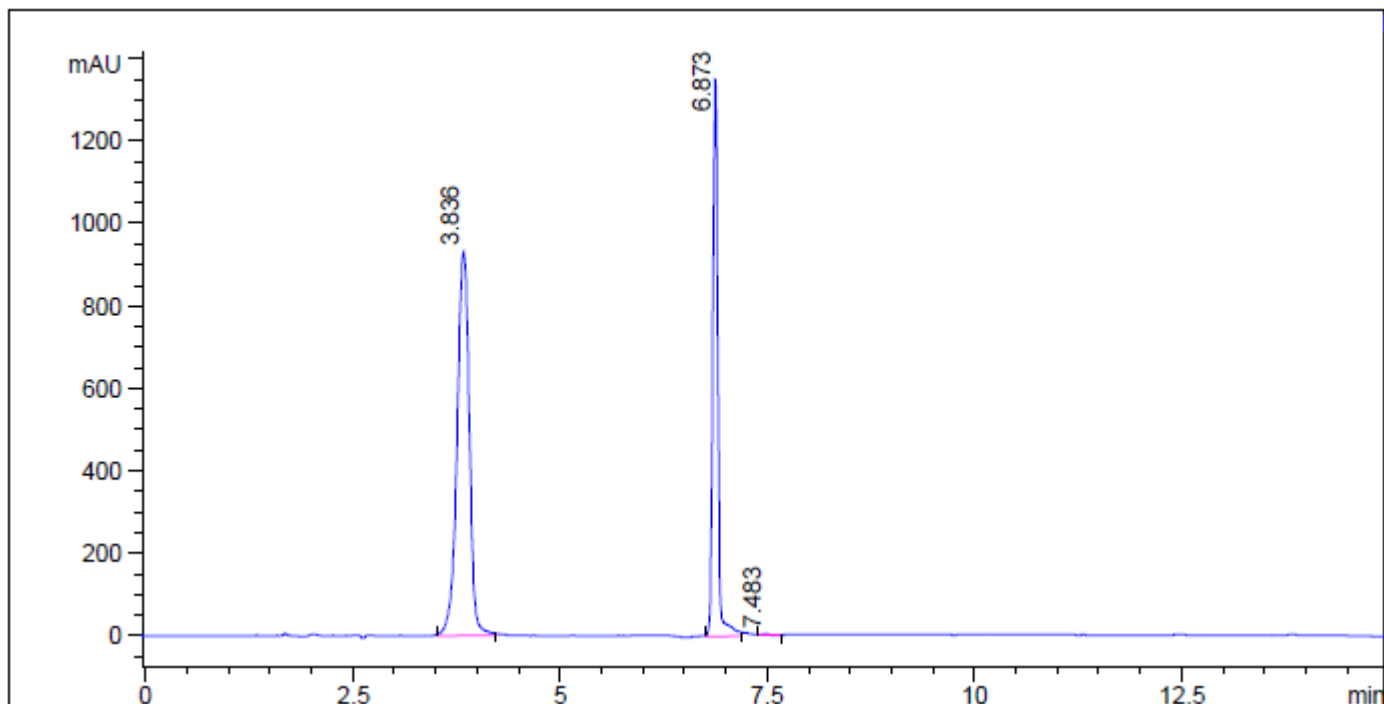

=====  
Area Percent Report  
=====

Signal 1: DAD1 A, Sig=220,16 Ref=off

| Peak # | RT [min] | Type | Width [min] | Height | Area     | Area % |
|--------|----------|------|-------------|--------|----------|--------|
| 1      | 3.836    | BB   | 0.162       | 40.577 | 9582.307 | 62.208 |
| 2      | 6.873    | BB   | 0.068       | 59.261 | 5796.280 | 37.629 |
| 3      | 7.483    | BB   | 0.093       | 0.162  | 25.003   | 0.162  |

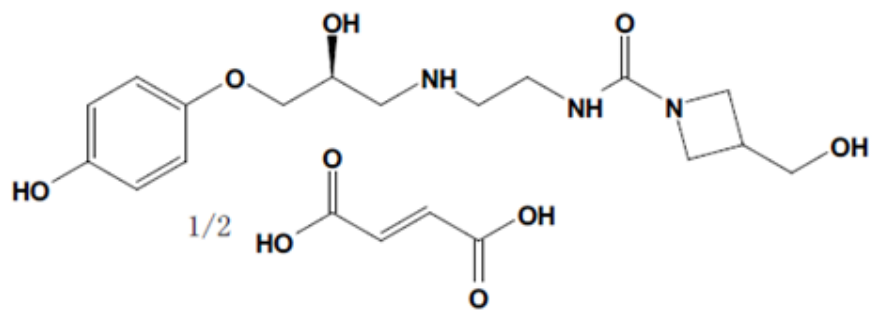

STD-101-D6  
400MHz <sup>1</sup>HNMR DMSO-*d*<sub>6</sub>

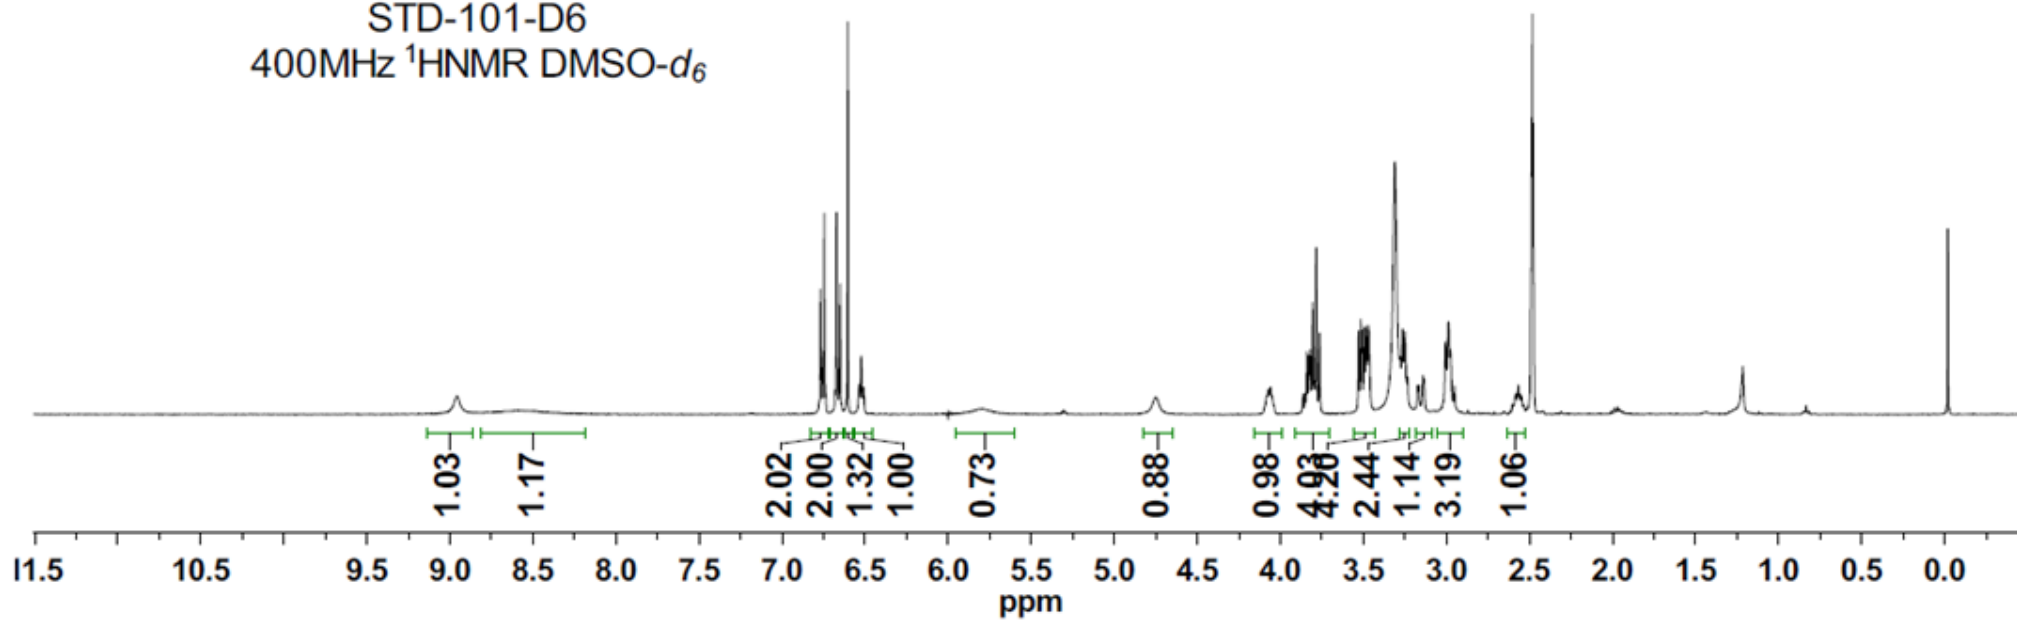

Supplement: pone.0180319.s001.pdf [file pone.0180319.s001.pdf]
