# Supplementary material for: Discovery of novel brain permeable and G protein-biased beta-1 adrenergic receptor partial agonists for the treatment of neurocognitive disorders
Source: PubMed Central journal article supplement (PMC5529018; doi:10.1371/journal.pone.0180319), 2017-07-26
Supplement: pone.0180319.s002.pdf [file pone.0180319.s002.pdf]

**S1 Table.** Binding affinity ( $K_i$ , nM) of Xamoterol at non-ADRB1 binding sites.

| Receptor                                                                                 | Hot ligand                                                              | Binding Affinity<br>$K_i$ (nM) |
|------------------------------------------------------------------------------------------|-------------------------------------------------------------------------|--------------------------------|
| ADRB1                                                                                    | [ <sup>125</sup> I]Pindolol                                             | 118.3                          |
| ADRB2                                                                                    | [ <sup>3</sup> H]CGP12177                                               | -                              |
| ADRB3                                                                                    | [ <sup>3</sup> H]CGP12177                                               | -                              |
| ADR- Alpha 1A                                                                            | [ <sup>3</sup> H] Prazosin                                              | -                              |
| ADR- Alpha 1B                                                                            | [ <sup>3</sup> H] Prazosin                                              | -                              |
| ADR - Alpha 1D                                                                           | [ <sup>3</sup> H] Prazosin                                              | -                              |
| ADR - Alpha 2A                                                                           | [ <sup>3</sup> H] Rauwolscine                                           | -                              |
| ADR - Alpha 2B                                                                           | [ <sup>3</sup> H] Rauwolscine                                           | -                              |
| ADR - Alpha 2C                                                                           | [ <sup>3</sup> H] Rauwolscine                                           | -                              |
| 5-HT 1A                                                                                  | [ <sup>3</sup> H]8-OH-DPAT                                              | -                              |
| 5-HT1B                                                                                   | [ <sup>3</sup> H]GR125743                                               | -                              |
| 5-HT 1D                                                                                  | [ <sup>3</sup> H]GR125743                                               | -                              |
| 5-HT 1E                                                                                  | [ <sup>3</sup> H]5HT                                                    | -                              |
| 5-HT 2A                                                                                  | [ <sup>3</sup> H]Ketanserin                                             | -                              |
| 5-HT 2B                                                                                  | [ <sup>3</sup> H]LSD                                                    | -                              |
| 5-HT 2C                                                                                  | [ <sup>3</sup> H]Mesulergine                                            | -                              |
| 5-HT 3                                                                                   | [ <sup>3</sup> H]GR65630                                                | -                              |
| 5-HT5A                                                                                   | [ <sup>3</sup> H]LSD                                                    | -                              |
| 5-HT6                                                                                    | [ <sup>3</sup> H]LSD                                                    | -                              |
| 5-HT7                                                                                    | [ <sup>3</sup> H]LSD                                                    | -                              |
| PBR#                                                                                     | [ <sup>3</sup> H]PK11195                                                | -                              |
| D <sub>1</sub>                                                                           | [ <sup>3</sup> H]SCH23390                                               | -                              |
| D <sub>2</sub>                                                                           | [ <sup>3</sup> H]N-Methylspiperone                                      | -                              |
| D <sub>3</sub>                                                                           | [ <sup>3</sup> H]N-Methylspiperone                                      | -                              |
| D <sub>4</sub>                                                                           | [ <sup>3</sup> H]N-Methylspiperone                                      | -                              |
| D <sub>5</sub>                                                                           | [ <sup>3</sup> H]SCH23390                                               | -                              |
| DAT                                                                                      | [ <sup>3</sup> H]WIN35428                                               | -                              |
| NET                                                                                      | [ <sup>3</sup> H]Nisoxetine                                             | -                              |
| δ-OR, μ-OR, κ-OR                                                                         | [ <sup>3</sup> H]DADLE, [ <sup>3</sup> H]DAMGO, [ <sup>3</sup> H]U69593 | -                              |
| GABA A receptor                                                                          | [ <sup>3</sup> H] Muscimol                                              | -                              |
| H <sub>1</sub>                                                                           | [ <sup>3</sup> H]Pyrilamine                                             | -                              |
| H <sub>3</sub>                                                                           | [ <sup>3</sup> H]Alpha-methylhistamine                                  | -                              |
| H <sub>4</sub>                                                                           | [ <sup>3</sup> H]Histamine                                              | -                              |
| M <sub>1</sub> , M <sub>2</sub> , M <sub>3</sub> , M <sub>4</sub> , M <sub>5</sub> mAChR | [ <sup>3</sup> H]QNB                                                    | -                              |
| Sigma 1 receptor                                                                         | [ <sup>3</sup> H]Pentazocine(+)                                         | -                              |
| Sigma 2 receptor                                                                         | [ <sup>3</sup> H]DTG                                                    | -                              |

\_ < 50% inhibition of radioligand binding at 10 μM Xamoterol

Receptor abbreviations:

ADR, adrenergic receptor; 5HT, serotonin receptor; PBR, peripheral benzodiazepine receptor; D, dopamine receptor; DAT, dopamine transporter; NET, norepinephrine transporter; OR, opioid receptor; GABA, *gamma*-aminobutyric acid receptor; H, histamine receptor; mAChR, muscarinic acetylcholine receptor.
